# Supplementary material
Source: Copernicus journal article supplement (doi:10.5194/amt-19-4393-2026)
Supplement: Supplementary file 1 [file amt-19-4393-2026-supplement.pdf]

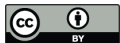

*Supplement of*

## **UV/Vis stratospheric air mass factors considering photochemistry at two Antarctic stations**

**Laura Gómez-Martín et al.**

*Correspondence to:* Laura Gómez-Martín ([gomezml@inta.es](mailto:gomezml@inta.es))

The copyright of individual parts of the supplement might differ from the article licence.

6

7 This supplementary material includes information on the comparison of the different  
8 approximations and RT models considered in this work, and provides the values of the obtained  
9 monthly averaged AMFs and photo-chemical model VCDs.

10 **S1. Comparison AURA 1D – 2D calculations:**

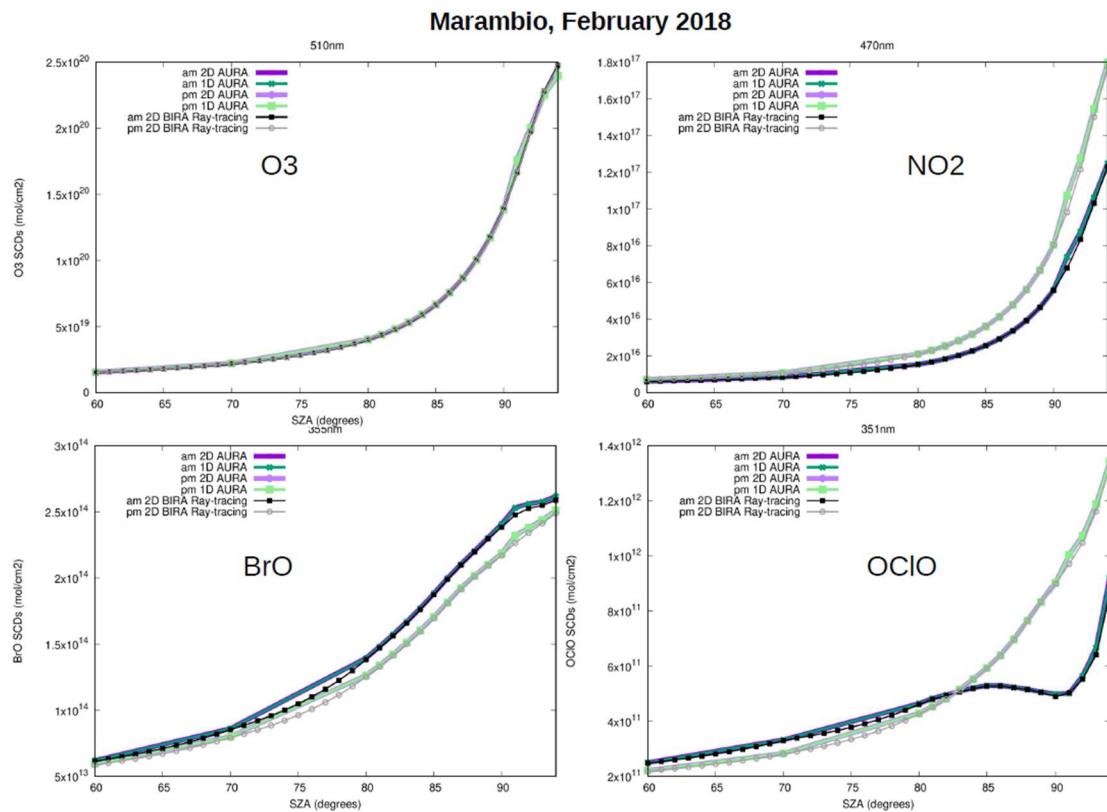

11

12 **Figure S1** Sunrise (am, dark violet and green) and sunset (pm, light violet and green) monthly SCD of O<sub>3</sub>  
13 (top left), NO<sub>2</sub> (top right), BrO (bottom left) and OCIO (bottom right) for Marambio, February 2018. 2D  
14 SCDs have been obtained with AURA by using the chemical model (violet), and 1D SCDs have been  
15 obtained with AURA by using the optical path averaged concentrations (i.e. a single profile for the whole  
16 atmosphere). 2D BIRA ray-tracing model results are also shown for comparison (am: black, pm: grey).

Marambio, September 2018

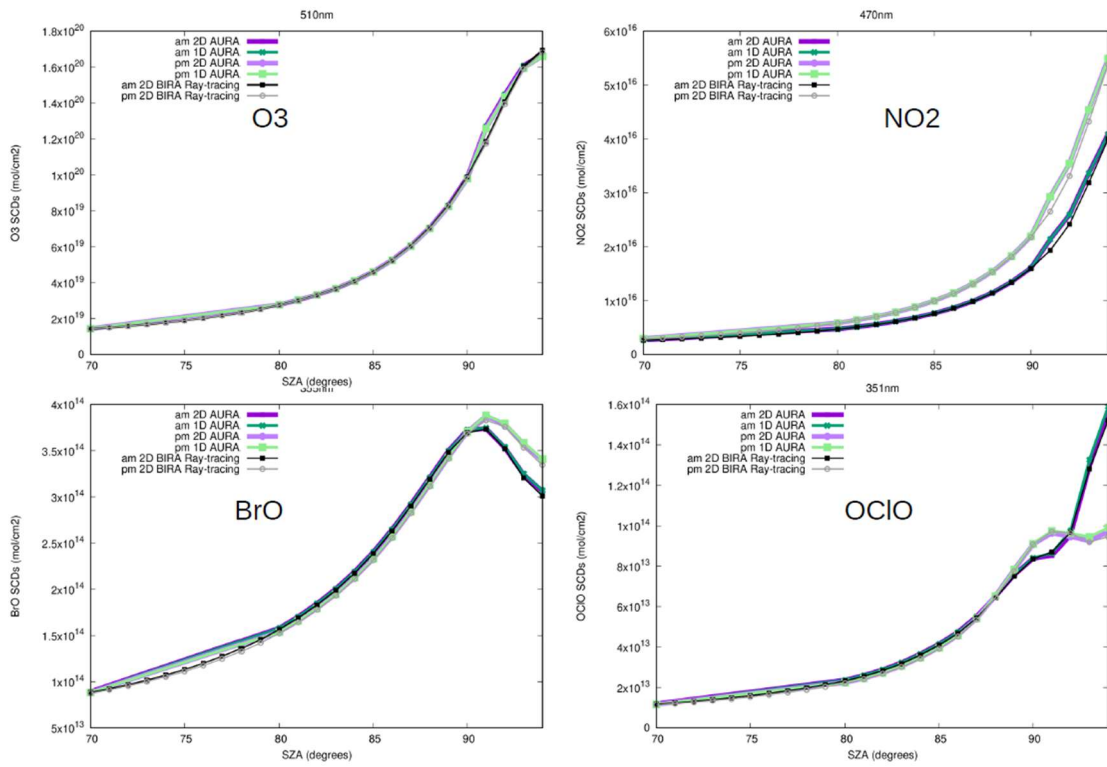

17

18 Figure S2 Same as S1 but for Marambio, September 2018.

Belgrano, February 2018

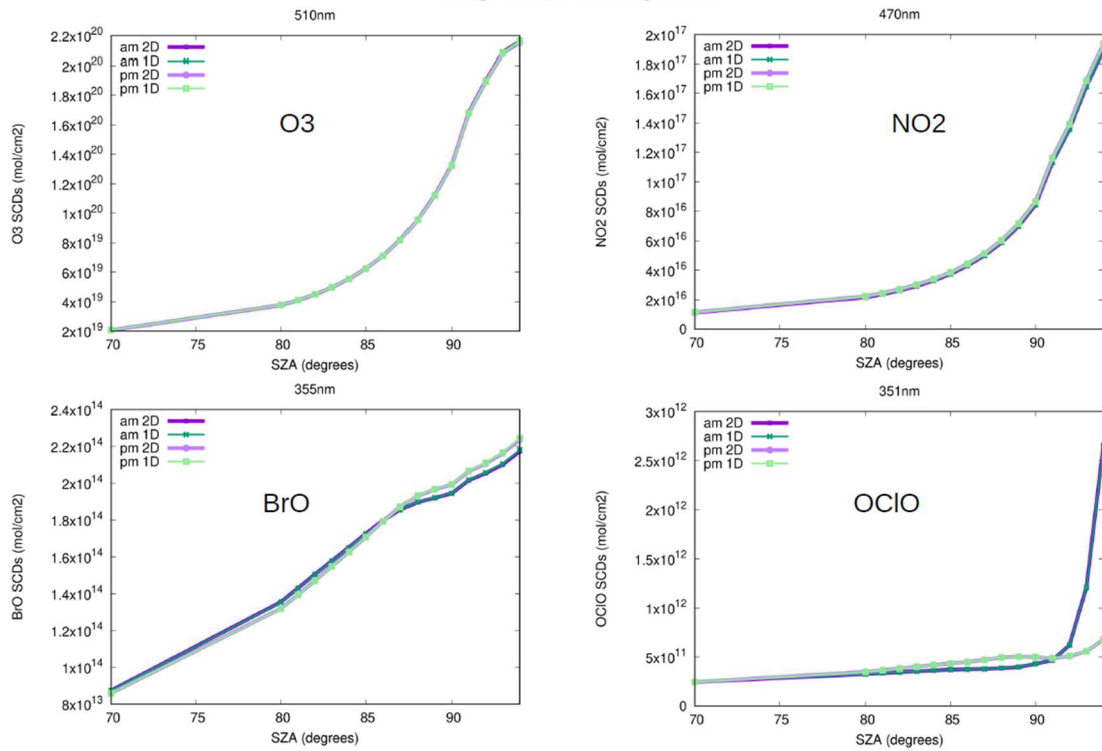

19

20 Figure S3 Same as S1 but for Belgrano, February 2018.

21

22

23

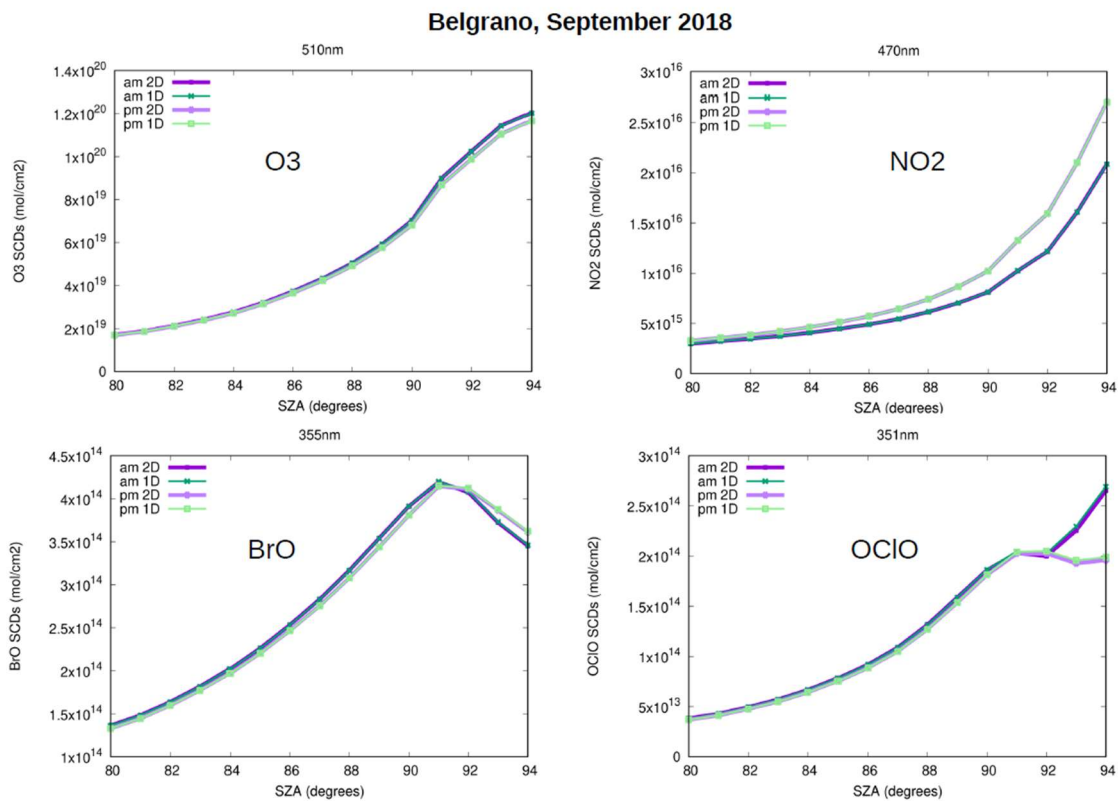

24

25 **Figure S4** Same as S1 but for Belgrano, September 2018.

26

27 **S2. Marambio monthly averaged AMF values:**

| SZA | Jan   | Feb   | Mar   | Apr   | May   | Jun   | Jul   | Aug   | Sep   | Oct   | Nov   | Dec   |
|-----|-------|-------|-------|-------|-------|-------|-------|-------|-------|-------|-------|-------|
| 80  | 5.31  | 5.33  | 5.33  | 5.22  | ---   | ---   | ---   | 5.29  | 5.25  | 5.25  | 5.35  | 5.30  |
|     | 5.47  | 5.48  | 5.50  | 5.40  | ---   | ---   | ---   | 5.48  | 5.47  | 5.47  | 5.48  | 5.46  |
| 81  | 5.80  | 5.83  | 5.85  | 5.82  | ---   | ---   | ---   | 5.53  | 5.61  | 5.63  | 5.83  | 5.78  |
|     | 5.95  | 5.99  | 6.02  | 6.01  | ---   | ---   | ---   | 5.73  | 5.81  | 5.85  | 5.98  | 5.92  |
| 82  | 6.34  | 6.39  | 6.40  | 6.36  | ---   | ---   | ---   | 5.89  | 6.04  | 6.06  | 6.39  | 6.30  |
|     | 6.48  | 6.55  | 6.58  | 6.57  | ---   | ---   | ---   | 6.08  | 6.26  | 6.28  | 6.54  | 6.47  |
| 83  | 6.94  | 7.01  | 7.02  | 6.95  | 6.86  | ---   | ---   | 6.54  | 6.52  | 6.53  | 7.00  | 6.89  |
|     | 7.09  | 7.18  | 7.21  | 7.15  | 7.05  | ---   | ---   | 6.74  | 6.75  | 6.74  | 7.16  | 7.06  |
| 84  | 7.68  | 7.83  | 7.81  | 7.71  | 7.49  | ---   | ---   | 7.08  | 7.07  | 7.08  | 7.78  | 7.63  |
|     | 7.86  | 7.99  | 8.02  | 7.92  | 7.69  | ---   | ---   | 7.31  | 7.31  | 7.32  | 7.94  | 7.79  |
| 85  | 8.69  | 8.88  | 8.87  | 8.66  | 8.18  | ---   | ---   | 7.77  | 7.73  | 7.72  | 8.78  | 8.58  |
|     | 8.86  | 9.05  | 9.08  | 8.89  | 8.38  | ---   | ---   | 7.98  | 8.00  | 7.99  | 8.95  | 8.75  |
| 86  | 10.09 | 10.28 | 10.26 | 9.86  | 5.82  | ---   | 8.27  | 8.49  | 8.48  | 8.45  | 10.10 | 9.89  |
|     | 10.25 | 10.49 | 10.46 | 10.13 | 5.98  | ---   | 8.52  | 8.74  | 8.72  | 8.69  | 10.30 | 10.05 |
| 87  | 11.60 | 11.86 | 11.74 | 10.99 | 9.00  | ---   | 8.89  | 9.13  | 9.08  | 9.02  | 11.50 | 11.28 |
|     | 11.78 | 12.06 | 12.01 | 11.28 | 9.24  | ---   | 9.13  | 9.35  | 9.34  | 9.23  | 11.71 | 11.44 |
| 88  | 13.67 | 14.00 | 13.89 | 12.39 | 10.23 | 6.67  | 9.83  | 9.86  | 9.71  | 9.52  | 13.31 | 13.11 |
|     | 13.87 | 14.27 | 14.19 | 12.72 | 10.47 | 6.80  | 10.04 | 10.10 | 9.98  | 9.84  | 13.53 | 13.33 |
| 89  | 16.64 | 16.49 | 15.69 | 12.89 | 10.66 | 10.07 | 10.83 | 10.39 | 10.17 | 9.85  | 15.45 | 15.59 |
|     | 16.87 | 16.81 | 16.00 | 13.28 | 10.96 | 10.29 | 11.01 | 10.67 | 10.50 | 10.14 | 15.77 | 15.82 |
| 90  | 19.77 | 14.36 | 11.25 | 8.04  | 9.89  | 11.00 | 11.03 | 10.34 | 9.93  | 9.22  | 15.44 | 18.68 |
|     | 20.09 | 14.96 | 11.90 | 8.69  | 10.24 | 11.32 | 11.31 | 10.64 | 10.27 | 9.52  | 15.85 | 18.91 |
| 91  | 17.36 | 7.57  | 5.33  | 3.86  | 6.93  | 10.03 | 9.97  | 8.55  | 7.65  | 6.86  | 9.86  | 20.48 |
|     | 17.92 | 8.41  | 6.11  | 4.48  | 7.31  | 10.33 | 10.25 | 8.85  | 7.97  | 7.17  | 10.50 | 20.85 |
| 92  | 12.05 | 4.64  | 3.40  | 2.60  | 3.70  | 6.22  | 6.26  | 4.95  | 4.12  | 3.43  | 5.93  | 19.48 |
|     | 12.83 | 5.53  | 4.11  | 3.12  | 4.06  | 6.51  | 6.57  | 5.26  | 4.40  | 3.70  | 6.69  | 20.04 |
| 93  | 8.47  | 3.56  | 2.77  | 2.20  | 2.43  | 3.29  | 3.41  | 2.95  | 2.58  | 2.37  | 4.31  | ---   |
|     | 9.30  | 4.42  | 3.40  | 2.61  | 2.74  | 3.51  | 3.64  | 3.18  | 2.83  | 2.59  | 5.10  | ---   |
| 94  | 6.15  | 3.25  | 2.73  | 2.22  | 2.28  | 2.71  | 2.77  | 2.57  | 2.37  | 2.29  | 3.48  | ---   |
|     | 6.96  | 3.99  | 3.29  | 2.60  | 2.55  | 2.90  | 2.97  | 2.79  | 2.60  | 2.51  | 4.11  | ---   |

28 **Table S1.** Monthly averaged OCIO AMFs for Marambio for sunrise (am). Green background is for values  
 29 obtained with surface albedo = 0.0, and white background for surface albedo = 1.0.

30

| SZA | Jan  | Feb  | Mar  | Apr  | May  | Jun | Jul  | Aug  | Sep  | Oct  | Nov  | Dec  |
|-----|------|------|------|------|------|-----|------|------|------|------|------|------|
| 80  | 5.27 | 5.27 | 5.26 | 5.18 | ---  | --- | ---  | 5.31 | 5.26 | 5.25 | 5.31 | 5.28 |
|     | 5.43 | 5.43 | 5.45 | 5.37 | ---  | --- | ---  | 5.49 | 5.46 | 5.45 | 5.43 | 5.42 |
| 81  | 5.71 | 5.72 | 5.68 | 5.66 | ---  | --- | ---  | 5.54 | 5.62 | 5.63 | 5.76 | 5.73 |
|     | 5.88 | 5.86 | 5.85 | 5.85 | ---  | --- | ---  | 5.74 | 5.83 | 5.85 | 5.88 | 5.86 |
| 82  | 6.20 | 6.20 | 6.13 | 6.10 | ---  | --- | ---  | 5.89 | 6.05 | 6.08 | 6.27 | 6.22 |
|     | 6.36 | 6.36 | 6.31 | 6.30 | ---  | --- | ---  | 6.09 | 6.27 | 6.27 | 6.39 | 6.36 |
| 83  | 6.77 | 6.75 | 6.65 | 6.59 | 6.59 | --- | ---  | 6.56 | 6.54 | 6.54 | 6.86 | 6.79 |
|     | 6.92 | 6.90 | 6.83 | 6.78 | 6.79 | --- | ---  | 6.76 | 6.75 | 6.74 | 6.99 | 6.94 |
| 84  | 7.49 | 7.45 | 7.30 | 7.22 | 7.18 | --- | ---  | 7.13 | 7.13 | 7.13 | 7.62 | 7.52 |
|     | 7.65 | 7.62 | 7.49 | 7.41 | 7.38 | --- | ---  | 7.33 | 7.32 | 7.33 | 7.74 | 7.69 |
| 85  | 8.33 | 8.31 | 8.04 | 7.89 | 7.77 | --- | ---  | 7.79 | 7.78 | 7.78 | 8.53 | 8.41 |
|     | 8.52 | 8.47 | 8.23 | 8.12 | 7.96 | --- | ---  | 8.03 | 8.00 | 7.99 | 8.66 | 8.56 |
| 86  | 9.35 | 9.26 | 8.87 | 8.66 | 6.12 | --- | 8.31 | 8.55 | 8.49 | 8.47 | 9.61 | 9.45 |

|    |       |       |       |       |       |       |       |       |       |       |       |       |
|----|-------|-------|-------|-------|-------|-------|-------|-------|-------|-------|-------|-------|
|    | 9.53  | 9.45  | 9.07  | 8.89  | 6.29  | ---   | 8.51  | 8.77  | 8.74  | 8.72  | 9.74  | 9.60  |
| 87 | 10.54 | 10.31 | 9.66  | 9.28  | 8.77  | ---   | 8.90  | 9.22  | 9.13  | 9.09  | 10.81 | 10.67 |
|    | 10.73 | 10.50 | 9.86  | 9.53  | 8.98  | ---   | 9.11  | 9.42  | 9.35  | 9.29  | 10.96 | 10.82 |
| 88 | 12.38 | 11.78 | 10.66 | 10.02 | 9.91  | 6.78  | 9.82  | 9.90  | 9.78  | 9.67  | 12.59 | 12.51 |
|    | 12.53 | 11.99 | 10.91 | 10.32 | 10.13 | 6.96  | 10.07 | 10.16 | 10.11 | 9.94  | 12.72 | 12.69 |
| 89 | 14.74 | 13.54 | 11.61 | 10.56 | 10.40 | 9.99  | 10.73 | 10.38 | 10.25 | 9.98  | 14.92 | 14.87 |
|    | 14.95 | 13.75 | 11.85 | 10.80 | 10.65 | 10.24 | 11.01 | 10.70 | 10.50 | 10.31 | 15.08 | 15.07 |
| 90 | 17.84 | 15.25 | 11.76 | 10.09 | 9.88  | 10.62 | 10.67 | 10.18 | 9.93  | 9.42  | 17.54 | 18.00 |
|    | 18.03 | 15.49 | 12.08 | 10.38 | 10.15 | 10.94 | 10.99 | 10.38 | 10.18 | 9.72  | 17.78 | 18.20 |
| 91 | 21.38 | 16.27 | 11.00 | 8.67  | 8.58  | 9.87  | 9.67  | 8.91  | 8.49  | 7.82  | 19.69 | 21.39 |
|    | 21.57 | 16.51 | 11.28 | 9.00  | 8.87  | 10.12 | 9.95  | 9.22  | 8.78  | 8.06  | 19.81 | 21.59 |
| 92 | 27.87 | 16.90 | 9.05  | 6.21  | 5.77  | 6.94  | 6.86  | 6.19  | 5.64  | 4.99  | 21.57 | 27.71 |
|    | 28.03 | 17.09 | 9.37  | 6.51  | 6.07  | 7.19  | 7.11  | 6.47  | 5.95  | 5.26  | 21.72 | 27.91 |
| 93 | ---   | 16.17 | 7.59  | 4.67  | 4.07  | 4.82  | 4.80  | 4.33  | 3.89  | 3.56  | 18.91 | ---   |
|    | ---   | 16.34 | 7.87  | 4.94  | 4.34  | 5.09  | 5.05  | 4.55  | 4.14  | 3.81  | 19.04 | ---   |
| 94 | ---   | 14.03 | 6.65  | 3.93  | 3.27  | 3.69  | 3.71  | 3.44  | 3.18  | 3.04  | 14.64 | ---   |
|    | ---   | 14.19 | 6.91  | 4.19  | 3.50  | 3.88  | 3.92  | 3.67  | 3.39  | 3.26  | 14.71 | ---   |

31 **Table S2** Monthly averaged OCIO AMFs for Marambio for sunset (pm). Green background is for values  
32 obtained with surface albedo = 0.0, and white background for surface albedo = 1.0.

33

| SZA | Jan   | Feb   | Mar    | Apr    | May   | Jun    | Jul    | Aug    | Sep    | Oct    | Nov   | Dec   |
|-----|-------|-------|--------|--------|-------|--------|--------|--------|--------|--------|-------|-------|
| 80  | 5.08  | 5.12  | 5.13   | 5.15   | ---   | ---    | ---    | 5.21   | 5.20   | 5.21   | 5.14  | 5.11  |
|     | 5.32  | 5.35  | 5.36   | 5.37   | ---   | ---    | ---    | 5.41   | 5.40   | 5.40   | 5.38  | 5.34  |
| 81  | 5.44  | 5.50  | 5.52   | 5.53   | ---   | ---    | ---    | 5.57   | 5.61   | 5.61   | 5.55  | 5.49  |
|     | 5.69  | 5.73  | 5.75   | 5.76   | ---   | ---    | ---    | 5.77   | 5.80   | 5.81   | 5.77  | 5.74  |
| 82  | 5.84  | 5.95  | 5.95   | 5.98   | ---   | ---    | ---    | 6.02   | 6.06   | 6.08   | 6.01  | 5.93  |
|     | 6.10  | 6.19  | 6.19   | 6.20   | ---   | ---    | ---    | 6.23   | 6.27   | 6.28   | 6.23  | 6.18  |
| 83  | 6.34  | 6.48  | 6.47   | 6.49   | 6.47  | ---    | ---    | 6.55   | 6.60   | 6.63   | 6.54  | 6.45  |
|     | 6.58  | 6.71  | 6.72   | 6.73   | 6.70  | ---    | ---    | 6.77   | 6.81   | 6.83   | 6.76  | 6.71  |
| 84  | 6.91  | 7.08  | 7.11   | 7.11   | 7.08  | ---    | ---    | 7.18   | 7.22   | 7.28   | 7.17  | 7.05  |
|     | 7.14  | 7.33  | 7.33   | 7.34   | 7.31  | ---    | ---    | 7.40   | 7.44   | 7.49   | 7.40  | 7.29  |
| 85  | 7.59  | 7.84  | 7.86   | 7.84   | 7.77  | ---    | ---    | 7.91   | 7.97   | 8.06   | 7.94  | 7.79  |
|     | 7.82  | 8.07  | 8.08   | 8.09   | 8.00  | ---    | ---    | 8.12   | 8.18   | 8.29   | 8.16  | 8.02  |
| 86  | 8.40  | 8.79  | 8.84   | 8.80   | 8.55  | ---    | 8.66   | 8.78   | 8.88   | 9.06   | 8.93  | 8.69  |
|     | 8.64  | 9.02  | 9.06   | 9.04   | 8.78  | ---    | 8.88   | 8.98   | 9.07   | 9.25   | 9.16  | 8.93  |
| 87  | 9.41  | 10.06 | 10.07  | 10.06  | 9.78  | ---    | 9.78   | 9.83   | 9.96   | 10.28  | 10.23 | 9.96  |
|     | 9.65  | 10.28 | 10.33  | 10.31  | 10.02 | ---    | 10.00  | 10.07  | 10.19  | 10.48  | 10.45 | 10.19 |
| 88  | 10.70 | 11.73 | 11.75  | 11.69  | 11.21 | 11.15  | 10.91  | 11.07  | 11.23  | 11.71  | 11.92 | 11.54 |
|     | 10.93 | 11.94 | 11.99  | 11.91  | 11.47 | 11.38  | 11.16  | 11.32  | 11.48  | 11.95  | 12.09 | 11.78 |
| 89  | 12.38 | 14.03 | 14.10  | 14.06  | 13.16 | 12.87  | 12.32  | 12.55  | 12.70  | 13.44  | 14.14 | 13.69 |
|     | 12.61 | 14.24 | 14.35  | 14.27  | 13.37 | 13.11  | 12.51  | 12.75  | 12.95  | 13.68  | 14.33 | 13.96 |
| 90  | 14.62 | 17.62 | 18.00  | 17.90  | 16.14 | 15.09  | 14.10  | 14.61  | 14.64  | 15.74  | 17.50 | 16.96 |
|     | 14.85 | 17.83 | 18.23  | 18.20  | 16.37 | 15.39  | 14.37  | 14.76  | 14.94  | 15.89  | 17.77 | 17.18 |
| 91  | 17.78 | 23.41 | 24.17  | 24.19  | 20.71 | 18.69  | 17.26  | 17.79  | 17.78  | 19.05  | 22.88 | 22.13 |
|     | 17.92 | 23.64 | 24.44  | 24.43  | 20.99 | 18.96  | 17.50  | 18.06  | 18.02  | 19.31  | 23.05 | 22.36 |
| 92  | 20.80 | 35.71 | 38.39  | 39.41  | 31.62 | 26.97  | 24.49  | 26.05  | 25.75  | 28.04  | 33.84 | 31.80 |
|     | 20.97 | 35.91 | 38.73  | 39.90  | 31.93 | 27.22  | 24.83  | 26.42  | 26.03  | 28.43  | 34.07 | 31.97 |
| 93  | 23.38 | 60.43 | 69.02  | 75.34  | 57.78 | 52.30  | 49.67  | 54.55  | 51.35  | 54.28  | 56.02 | ---   |
|     | 23.45 | 60.81 | 69.21  | 76.03  | 58.59 | 52.80  | 50.44  | 54.80  | 51.92  | 54.88  | 56.25 | ---   |
| 94  | 25.17 | 98.68 | 120.22 | 136.32 | 94.33 | 101.53 | 110.22 | 118.48 | 105.87 | 101.29 | 85.70 | ---   |
|     | 25.29 | 99.06 | 120.85 | 137.28 | 95.31 | 102.59 | 111.85 | 120.78 | 107.23 | 102.09 | 86.23 | ---   |

34 **Table S3** Monthly averaged BrO AMFs for Marambio for sunrise (am). Green background is for values  
 35 obtained with surface albedo = 0.0, and white background for surface albedo = 1.0.

36

| SZA | Jan   | Feb   | Mar   | Apr   | May   | Jun   | Jul   | Aug   | Sep   | Oct   | Nov   | Dec   |
|-----|-------|-------|-------|-------|-------|-------|-------|-------|-------|-------|-------|-------|
| 80  | 5.07  | 5.11  | 5.13  | 5.15  | ---   | ---   | ---   | 5.21  | 5.21  | 5.21  | 5.13  | 5.10  |
|     | 5.32  | 5.34  | 5.36  | 5.37  | ---   | ---   | ---   | 5.41  | 5.41  | 5.40  | 5.37  | 5.33  |
| 81  | 5.42  | 5.48  | 5.50  | 5.53  | ---   | ---   | ---   | 5.58  | 5.60  | 5.60  | 5.53  | 5.48  |
|     | 5.67  | 5.72  | 5.75  | 5.76  | ---   | ---   | ---   | 5.79  | 5.80  | 5.79  | 5.76  | 5.72  |
| 82  | 5.83  | 5.92  | 5.93  | 5.96  | ---   | ---   | ---   | 6.03  | 6.06  | 6.05  | 5.97  | 5.91  |
|     | 6.08  | 6.16  | 6.17  | 6.20  | ---   | ---   | ---   | 6.24  | 6.26  | 6.26  | 6.20  | 6.15  |
| 83  | 6.31  | 6.43  | 6.44  | 6.47  | 6.49  | ---   | ---   | 6.56  | 6.60  | 6.60  | 6.51  | 6.42  |
|     | 6.55  | 6.66  | 6.68  | 6.71  | 6.71  | ---   | ---   | 6.78  | 6.80  | 6.81  | 6.73  | 6.67  |
| 84  | 6.86  | 7.02  | 7.03  | 7.08  | 7.09  | ---   | ---   | 7.20  | 7.23  | 7.25  | 7.13  | 7.01  |
|     | 7.11  | 7.26  | 7.29  | 7.31  | 7.33  | ---   | ---   | 7.41  | 7.43  | 7.44  | 7.36  | 7.26  |
| 85  | 7.53  | 7.72  | 7.70  | 7.76  | 7.73  | ---   | ---   | 7.92  | 7.96  | 7.98  | 7.88  | 7.72  |
|     | 7.77  | 7.96  | 7.96  | 8.00  | 7.98  | ---   | ---   | 8.13  | 8.17  | 8.21  | 8.09  | 7.96  |
| 86  | 8.29  | 8.54  | 8.54  | 8.56  | 8.46  | ---   | 8.66  | 8.77  | 8.82  | 8.92  | 8.76  | 8.58  |
|     | 8.53  | 8.81  | 8.77  | 8.81  | 8.71  | ---   | 8.89  | 8.99  | 9.05  | 9.11  | 9.00  | 8.80  |
| 87  | 9.25  | 9.67  | 9.54  | 9.56  | 9.56  | ---   | 9.78  | 9.82  | 9.90  | 10.08 | 10.00 | 9.76  |
|     | 9.50  | 9.92  | 9.81  | 9.82  | 9.82  | ---   | 10.04 | 10.07 | 10.12 | 10.30 | 10.24 | 10.01 |
| 88  | 10.46 | 11.07 | 10.87 | 10.78 | 10.68 | 11.01 | 10.94 | 11.03 | 11.16 | 11.48 | 11.56 | 11.30 |
|     | 10.68 | 11.34 | 11.13 | 11.06 | 10.98 | 11.27 | 11.19 | 11.31 | 11.36 | 11.70 | 11.82 | 11.54 |
| 89  | 12.06 | 12.90 | 12.42 | 12.19 | 12.01 | 12.52 | 12.24 | 12.40 | 12.55 | 13.19 | 13.67 | 13.30 |
|     | 12.22 | 13.16 | 12.70 | 12.52 | 12.27 | 12.77 | 12.54 | 12.64 | 12.80 | 13.45 | 13.91 | 13.53 |
| 90  | 14.21 | 15.57 | 14.56 | 13.90 | 13.37 | 13.97 | 13.78 | 13.86 | 13.98 | 15.28 | 16.71 | 16.39 |
|     | 14.38 | 15.77 | 14.87 | 14.21 | 13.70 | 14.29 | 14.00 | 14.14 | 14.32 | 15.48 | 17.00 | 16.64 |
| 91  | 17.26 | 19.36 | 17.41 | 16.01 | 14.98 | 15.62 | 15.43 | 15.47 | 15.33 | 17.55 | 21.29 | 21.09 |
|     | 17.43 | 19.61 | 17.70 | 16.30 | 15.30 | 15.92 | 15.72 | 15.70 | 15.58 | 17.81 | 21.46 | 21.32 |
| 92  | 20.58 | 27.14 | 23.13 | 19.85 | 17.38 | 17.87 | 17.73 | 17.41 | 16.90 | 21.28 | 30.33 | 30.73 |
|     | 20.70 | 27.43 | 23.45 | 20.19 | 17.74 | 18.18 | 17.98 | 17.67 | 17.22 | 21.52 | 30.48 | 30.91 |
| 93  | ---   | 40.09 | 32.41 | 25.88 | 20.64 | 20.88 | 20.94 | 19.92 | 19.06 | 26.63 | 44.48 | ---   |
|     | ---   | 40.48 | 32.91 | 26.23 | 21.00 | 21.27 | 21.20 | 20.24 | 19.35 | 26.90 | 44.49 | ---   |
| 94  | ---   | 58.59 | 46.99 | 34.77 | 25.04 | 25.23 | 25.48 | 23.43 | 22.10 | 33.72 | 63.40 | ---   |
|     | ---   | 58.93 | 47.41 | 35.29 | 25.50 | 25.58 | 25.88 | 23.74 | 22.46 | 34.20 | 63.80 | ---   |

37 **Table S4** Monthly averaged BrO AMFs for Marambio for sunset (pm). Green background is for values  
 38 obtained with surface albedo = 0.0, and white background for surface albedo = 1.0.

39

| SZA | Jan  | Feb  | Mar  | Apr  | May  | Jun | Jul  | Aug  | Sep  | Oct  | Nov  | Dec  |
|-----|------|------|------|------|------|-----|------|------|------|------|------|------|
| 80  | 5.13 | 5.12 | 5.12 | 5.27 | ---  | --- | 0.00 | 4.94 | 5.03 | 5.05 | 5.12 | 5.12 |
|     | 5.19 | 5.19 | 5.19 | 5.37 | ---  | --- | 0.00 | 5.12 | 5.18 | 5.18 | 5.19 | 5.19 |
| 81  | 5.55 | 5.54 | 5.54 | 5.58 | ---  | --- | 0.00 | 5.40 | 5.46 | 5.47 | 5.54 | 5.55 |
|     | 5.61 | 5.61 | 5.61 | 5.67 | ---  | --- | 0.00 | 5.59 | 5.60 | 5.60 | 5.62 | 5.61 |
| 82  | 6.06 | 6.04 | 6.03 | 6.04 | ---  | --- | 0.00 | 6.00 | 5.95 | 5.95 | 6.05 | 6.06 |
|     | 6.11 | 6.11 | 6.11 | 6.13 | ---  | --- | 0.00 | 6.18 | 6.09 | 6.08 | 6.11 | 6.11 |
| 83  | 6.64 | 6.62 | 6.61 | 6.61 | 6.90 | --- | 0.00 | 6.54 | 6.51 | 6.51 | 6.63 | 6.64 |
|     | 6.69 | 6.68 | 6.67 | 6.69 | 7.02 | --- | 0.00 | 6.71 | 6.65 | 6.63 | 6.69 | 6.69 |
| 84  | 7.35 | 7.32 | 7.30 | 7.29 | 7.45 | --- | 0.00 | 7.20 | 7.20 | 7.19 | 7.33 | 7.35 |
|     | 7.39 | 7.37 | 7.36 | 7.38 | 7.57 | --- | 0.00 | 7.37 | 7.33 | 7.31 | 7.39 | 7.39 |

|    |       |       |       |       |       |       |       |       |       |       |       |       |
|----|-------|-------|-------|-------|-------|-------|-------|-------|-------|-------|-------|-------|
| 85 | 8.21  | 8.16  | 8.14  | 8.12  | 8.37  | ---   | 0.00  | 8.01  | 8.03  | 8.02  | 8.19  | 8.21  |
|    | 8.23  | 8.21  | 8.19  | 8.20  | 8.50  | ---   | 0.00  | 8.18  | 8.15  | 8.13  | 8.23  | 8.24  |
| 86 | 9.21  | 9.17  | 9.12  | 9.10  | 10.07 | ---   | 9.13  | 8.98  | 9.02  | 9.00  | 9.20  | 9.23  |
|    | 9.26  | 9.20  | 9.17  | 9.18  | 10.19 | ---   | 9.25  | 9.15  | 9.13  | 9.10  | 9.23  | 9.26  |
| 87 | 10.34 | 10.27 | 10.20 | 10.18 | 11.07 | ---   | 11.21 | 10.05 | 10.09 | 10.06 | 10.31 | 10.35 |
|    | 10.38 | 10.30 | 10.25 | 10.23 | 11.18 | ---   | 11.34 | 10.19 | 10.20 | 10.15 | 10.35 | 10.39 |
| 88 | 11.73 | 11.61 | 11.52 | 11.46 | 12.17 | 12.47 | 12.36 | 11.33 | 11.38 | 11.33 | 11.65 | 11.77 |
|    | 11.79 | 11.66 | 11.55 | 11.51 | 12.28 | 12.63 | 12.48 | 11.44 | 11.48 | 11.43 | 11.71 | 11.80 |
| 89 | 13.47 | 13.29 | 13.11 | 13.07 | 13.52 | 14.29 | 13.50 | 12.83 | 12.97 | 12.93 | 13.34 | 13.49 |
|    | 13.51 | 13.32 | 13.16 | 13.08 | 13.63 | 14.41 | 13.59 | 12.95 | 13.07 | 13.01 | 13.38 | 13.53 |
| 90 | 15.56 | 15.30 | 15.07 | 14.93 | 15.19 | 16.17 | 14.85 | 14.61 | 14.82 | 14.74 | 15.35 | 15.64 |
|    | 15.62 | 15.31 | 15.11 | 15.02 | 15.27 | 16.28 | 15.01 | 14.80 | 14.86 | 14.83 | 15.39 | 15.66 |
| 91 | 18.03 | 17.58 | 17.21 | 16.94 | 16.82 | 17.49 | 16.10 | 16.30 | 16.70 | 16.71 | 17.64 | 18.10 |
|    | 18.06 | 17.62 | 17.27 | 17.01 | 16.86 | 17.62 | 16.17 | 16.44 | 16.75 | 16.80 | 17.72 | 18.14 |
| 92 | 20.39 | 19.78 | 19.15 | 18.59 | 18.02 | 18.78 | 17.38 | 17.67 | 18.10 | 18.13 | 19.74 | 20.52 |
|    | 20.45 | 19.78 | 19.20 | 18.63 | 18.10 | 18.83 | 17.43 | 17.74 | 18.20 | 18.22 | 19.79 | 20.52 |
| 93 | 22.46 | 21.55 | 20.59 | 19.33 | 17.99 | 18.49 | 17.53 | 17.53 | 18.71 | 19.05 | 21.58 | ---   |
|    | 22.38 | 21.54 | 20.54 | 19.35 | 18.01 | 18.56 | 17.56 | 17.48 | 18.68 | 19.15 | 21.55 | ---   |
| 94 | 24.94 | 23.26 | 22.11 | 20.34 | 18.19 | 18.37 | 17.56 | 17.77 | 19.41 | 19.85 | 22.98 | ---   |
|    | 24.96 | 23.22 | 22.12 | 20.28 | 18.21 | 18.35 | 17.60 | 17.75 | 19.48 | 19.93 | 23.07 | ---   |

40 **Table S5** Monthly averaged NO<sub>2</sub> AMFs for Marambio for sunrise (am). Green background is for values  
41 obtained with surface albedo = 0.0, and white background for surface albedo = 1.0.

42

| SZA | Jan   | Feb   | Mar   | Apr   | May   | Jun   | Jul   | Aug   | Sep   | Oct   | Nov   | Dec   |
|-----|-------|-------|-------|-------|-------|-------|-------|-------|-------|-------|-------|-------|
| 80  | 5.14  | 5.13  | 5.10  | 5.22  | ---   | ---   | ---   | 4.99  | 5.04  | 5.08  | 5.13  | 5.14  |
|     | 5.19  | 5.17  | 5.16  | 5.30  | ---   | ---   | ---   | 5.14  | 5.15  | 5.17  | 5.19  | 5.19  |
| 81  | 5.58  | 5.55  | 5.53  | 5.52  | ---   | ---   | ---   | 5.38  | 5.47  | 5.50  | 5.56  | 5.56  |
|     | 5.63  | 5.60  | 5.58  | 5.59  | ---   | ---   | ---   | 5.53  | 5.57  | 5.59  | 5.62  | 5.62  |
| 82  | 6.09  | 6.05  | 6.02  | 5.97  | ---   | ---   | ---   | 5.96  | 5.96  | 6.00  | 6.07  | 6.08  |
|     | 6.13  | 6.10  | 6.08  | 6.04  | ---   | ---   | ---   | 6.11  | 6.06  | 6.08  | 6.12  | 6.12  |
| 83  | 6.68  | 6.64  | 6.61  | 6.54  | 6.68  | ---   | ---   | 6.45  | 6.53  | 6.57  | 6.66  | 6.66  |
|     | 6.72  | 6.68  | 6.65  | 6.61  | 6.78  | ---   | ---   | 6.58  | 6.63  | 6.66  | 6.71  | 6.71  |
| 84  | 7.40  | 7.34  | 7.31  | 7.23  | 7.28  | ---   | ---   | 7.07  | 7.23  | 7.27  | 7.38  | 7.38  |
|     | 7.44  | 7.38  | 7.35  | 7.29  | 7.38  | ---   | ---   | 7.19  | 7.31  | 7.34  | 7.42  | 7.42  |
| 85  | 8.26  | 8.20  | 8.15  | 8.07  | 8.17  | ---   | ---   | 7.87  | 8.07  | 8.12  | 8.25  | 8.25  |
|     | 8.30  | 8.23  | 8.19  | 8.12  | 8.27  | ---   | ---   | 7.99  | 8.15  | 8.18  | 8.28  | 8.28  |
| 86  | 9.31  | 9.21  | 9.16  | 9.06  | 9.71  | ---   | 8.86  | 8.83  | 9.07  | 9.12  | 9.26  | 9.28  |
|     | 9.34  | 9.25  | 9.19  | 9.09  | 9.80  | ---   | 8.95  | 8.94  | 9.13  | 9.19  | 9.30  | 9.31  |
| 87  | 10.48 | 10.34 | 10.27 | 10.13 | 10.45 | ---   | 10.82 | 9.88  | 10.17 | 10.23 | 10.42 | 10.44 |
|     | 10.51 | 10.37 | 10.28 | 10.17 | 10.54 | ---   | 10.92 | 9.97  | 10.22 | 10.27 | 10.45 | 10.47 |
| 88  | 11.93 | 11.73 | 11.61 | 11.47 | 11.46 | 12.02 | 11.71 | 11.17 | 11.52 | 11.58 | 11.85 | 11.87 |
|     | 11.97 | 11.76 | 11.64 | 11.49 | 11.53 | 12.16 | 11.80 | 11.25 | 11.57 | 11.64 | 11.88 | 11.90 |
| 89  | 13.75 | 13.44 | 13.31 | 13.09 | 12.82 | 13.03 | 12.66 | 12.73 | 13.18 | 13.27 | 13.60 | 13.67 |
|     | 13.78 | 13.50 | 13.34 | 13.18 | 12.87 | 13.18 | 12.74 | 12.77 | 13.23 | 13.30 | 13.62 | 13.68 |
| 90  | 15.98 | 15.55 | 15.39 | 15.13 | 14.60 | 14.37 | 13.88 | 14.55 | 15.20 | 15.18 | 15.70 | 15.89 |
|     | 16.04 | 15.61 | 15.39 | 15.16 | 14.65 | 14.50 | 14.06 | 14.63 | 15.17 | 15.24 | 15.76 | 15.90 |
| 91  | 18.59 | 18.01 | 17.68 | 17.30 | 16.47 | 15.78 | 15.21 | 16.40 | 17.19 | 17.36 | 18.16 | 18.40 |
|     | 18.63 | 18.05 | 17.73 | 17.33 | 16.52 | 15.88 | 15.30 | 16.47 | 17.24 | 17.38 | 18.19 | 18.42 |
| 92  | 21.03 | 20.34 | 19.78 | 19.10 | 17.97 | 17.10 | 16.51 | 17.88 | 18.85 | 19.05 | 20.47 | 20.93 |
|     | 21.07 | 20.37 | 19.81 | 19.11 | 18.04 | 17.12 | 16.55 | 17.88 | 18.91 | 19.13 | 20.47 | 20.95 |
| 93  | ---   | 22.34 | 21.48 | 20.27 | 18.53 | 17.58 | 17.22 | 18.59 | 19.96 | 20.45 | 22.53 | ---   |

|    |      |       |       |       |       |       |       |       |       |       |       |      |
|----|------|-------|-------|-------|-------|-------|-------|-------|-------|-------|-------|------|
|    | 0.00 | 22.33 | 21.42 | 20.19 | 18.58 | 17.62 | 17.11 | 18.56 | 19.99 | 20.44 | 22.54 | 0.00 |
| 94 | 0.00 | 24.18 | 23.13 | 21.42 | 19.36 | 18.43 | 18.24 | 19.74 | 21.27 | 21.61 | 24.20 | 0.00 |
|    | 0.00 | 24.13 | 23.10 | 21.38 | 19.40 | 18.48 | 18.20 | 19.77 | 21.17 | 21.65 | 24.20 | 0.00 |

43 **Table S6** Monthly averaged NO<sub>2</sub> AMFs for Marambio for sunset (pm). Green background is for values  
 44 obtained with surface albedo = 0.0, and white background for surface albedo = 1.0.

45

| SZA | Jan   | Feb   | Mar   | Apr   | May   | Jun   | Jul   | Aug   | Sep   | Oct   | Nov   | Dec   |
|-----|-------|-------|-------|-------|-------|-------|-------|-------|-------|-------|-------|-------|
| 80  | 5.10  | 5.11  | 5.09  | 5.13  | ---   | ---   | ---   | 5.06  | 5.01  | 5.01  | 5.09  | 5.10  |
|     | 5.24  | 5.23  | 5.24  | 5.29  | ---   | ---   | ---   | 5.25  | 5.21  | 5.19  | 5.23  | 5.23  |
| 81  | 5.54  | 5.54  | 5.54  | 5.54  | ---   | ---   | ---   | 5.44  | 5.46  | 5.44  | 5.52  | 5.54  |
|     | 5.68  | 5.68  | 5.67  | 5.69  | ---   | ---   | ---   | 5.62  | 5.65  | 5.62  | 5.65  | 5.66  |
| 82  | 6.06  | 6.07  | 6.06  | 6.04  | ---   | ---   | ---   | 5.98  | 5.98  | 5.94  | 6.05  | 6.07  |
|     | 6.19  | 6.18  | 6.18  | 6.19  | ---   | ---   | ---   | 6.15  | 6.16  | 6.12  | 6.17  | 6.18  |
| 83  | 6.69  | 6.69  | 6.68  | 6.68  | 6.61  | ---   | ---   | 6.64  | 6.60  | 6.54  | 6.68  | 6.69  |
|     | 6.80  | 6.80  | 6.81  | 6.81  | 6.76  | ---   | ---   | 6.80  | 6.77  | 6.71  | 6.78  | 6.80  |
| 84  | 7.44  | 7.44  | 7.43  | 7.42  | 7.38  | ---   | ---   | 7.41  | 7.35  | 7.28  | 7.42  | 7.44  |
|     | 7.54  | 7.55  | 7.55  | 7.54  | 7.51  | ---   | ---   | 7.57  | 7.50  | 7.43  | 7.53  | 7.53  |
| 85  | 8.36  | 8.36  | 8.34  | 8.35  | 8.26  | ---   | ---   | 8.35  | 8.25  | 8.16  | 8.33  | 8.35  |
|     | 8.45  | 8.44  | 8.45  | 8.46  | 8.38  | ---   | ---   | 8.50  | 8.39  | 8.29  | 8.43  | 8.44  |
| 86  | 9.49  | 9.49  | 9.49  | 9.50  | 9.49  | ---   | 9.42  | 9.53  | 9.38  | 9.24  | 9.46  | 9.47  |
|     | 9.55  | 9.55  | 9.56  | 9.57  | 9.59  | ---   | 9.53  | 9.65  | 9.50  | 9.36  | 9.52  | 9.54  |
| 87  | 10.86 | 10.87 | 10.87 | 10.91 | 11.05 | ---   | 11.07 | 10.99 | 10.79 | 10.57 | 10.83 | 10.85 |
|     | 10.93 | 10.91 | 10.92 | 10.99 | 11.12 | ---   | 11.13 | 11.09 | 10.87 | 10.66 | 10.88 | 10.89 |
| 88  | 12.56 | 12.57 | 12.60 | 12.66 | 12.85 | 12.60 | 12.89 | 12.80 | 12.53 | 12.20 | 12.50 | 12.52 |
|     | 12.62 | 12.63 | 12.65 | 12.74 | 12.91 | 12.70 | 12.96 | 12.93 | 12.61 | 12.28 | 12.56 | 12.56 |
| 89  | 14.70 | 14.67 | 14.72 | 14.81 | 15.05 | 15.04 | 15.20 | 15.17 | 14.67 | 14.20 | 14.56 | 14.58 |
|     | 14.70 | 14.65 | 14.75 | 14.92 | 15.14 | 15.12 | 15.27 | 15.22 | 14.80 | 14.30 | 14.60 | 14.64 |
| 90  | 17.19 | 17.22 | 17.26 | 17.50 | 17.79 | 18.02 | 18.10 | 18.02 | 17.40 | 16.62 | 17.04 | 17.03 |
|     | 17.23 | 17.29 | 17.35 | 17.59 | 17.85 | 18.03 | 18.14 | 18.09 | 17.52 | 16.69 | 17.16 | 17.14 |
| 91  | 20.26 | 20.33 | 20.50 | 20.83 | 21.27 | 21.55 | 21.66 | 21.54 | 20.68 | 19.52 | 20.08 | 20.11 |
|     | 20.34 | 20.36 | 20.55 | 20.89 | 21.32 | 21.67 | 21.73 | 21.61 | 20.72 | 19.59 | 20.10 | 20.13 |
| 92  | 23.74 | 23.88 | 24.21 | 24.72 | 25.26 | 25.71 | 25.66 | 25.47 | 24.36 | 22.87 | 23.59 | 23.55 |
|     | 23.87 | 23.96 | 24.22 | 24.73 | 25.33 | 25.71 | 25.76 | 25.59 | 24.48 | 22.93 | 23.61 | 23.62 |
| 93  | 26.96 | 27.28 | 27.86 | 28.34 | 29.19 | 29.66 | 29.20 | 28.94 | 27.65 | 26.32 | 27.09 | ---   |
|     | 27.15 | 27.33 | 27.86 | 28.43 | 29.17 | 29.50 | 29.52 | 28.86 | 27.64 | 26.30 | 27.17 | ---   |
| 94  | 29.53 | 29.59 | 30.20 | 30.79 | 31.40 | 31.53 | 30.87 | 30.09 | 29.30 | 29.00 | 29.68 | ---   |
|     | 29.59 | 29.67 | 30.17 | 30.80 | 31.41 | 31.56 | 31.04 | 30.21 | 29.42 | 28.96 | 29.84 | ---   |

46 **Table S7** Monthly averaged O<sub>3</sub> AMFs for Marambio for sunrise (am). Green background is for values  
 47 obtained with surface albedo = 0.0, and white background for surface albedo = 1.0.

48

| SZA | Jan  | Feb  | Mar  | Apr  | May  | Jun | Jul | Aug  | Sep  | Oct  | Nov  | Dec  |
|-----|------|------|------|------|------|-----|-----|------|------|------|------|------|
| 80  | 5.10 | 5.10 | 5.09 | 5.13 | ---  | --- | --- | 5.06 | 5.01 | 5.01 | 5.09 | 5.10 |
|     | 5.23 | 5.24 | 5.23 | 5.28 | ---  | --- | --- | 5.25 | 5.21 | 5.19 | 5.22 | 5.23 |
| 81  | 5.54 | 5.54 | 5.53 | 5.53 | ---  | --- | --- | 5.45 | 5.46 | 5.44 | 5.53 | 5.55 |
|     | 5.67 | 5.68 | 5.67 | 5.69 | ---  | --- | --- | 5.62 | 5.65 | 5.61 | 5.66 | 5.66 |
| 82  | 6.06 | 6.06 | 6.05 | 6.04 | ---  | --- | --- | 5.98 | 5.97 | 5.94 | 6.05 | 6.06 |
|     | 6.19 | 6.19 | 6.18 | 6.19 | ---  | --- | --- | 6.15 | 6.16 | 6.12 | 6.18 | 6.18 |
| 83  | 6.69 | 6.69 | 6.68 | 6.67 | 6.59 | --- | --- | 6.64 | 6.59 | 6.55 | 6.67 | 6.69 |

|    |       |       |       |       |       |       |       |       |       |       |       |       |
|----|-------|-------|-------|-------|-------|-------|-------|-------|-------|-------|-------|-------|
|    | 6.80  | 6.80  | 6.80  | 6.81  | 6.75  | ---   | ---   | 6.82  | 6.77  | 6.72  | 6.79  | 6.80  |
| 84 | 7.45  | 7.45  | 7.44  | 7.43  | 7.37  | ---   | ---   | 7.42  | 7.34  | 7.28  | 7.42  | 7.44  |
|    | 7.55  | 7.54  | 7.54  | 7.56  | 7.52  | ---   | ---   | 7.58  | 7.49  | 7.43  | 7.53  | 7.55  |
| 85 | 8.37  | 8.37  | 8.35  | 8.36  | 8.26  | ---   | ---   | 8.36  | 8.26  | 8.16  | 8.34  | 8.35  |
|    | 8.46  | 8.45  | 8.45  | 8.45  | 8.37  | ---   | ---   | 8.50  | 8.39  | 8.29  | 8.42  | 8.44  |
| 86 | 9.49  | 9.50  | 9.47  | 9.51  | 9.49  | ---   | 9.45  | 9.52  | 9.37  | 9.25  | 9.46  | 9.49  |
|    | 9.58  | 9.55  | 9.57  | 9.58  | 9.59  | ---   | 9.54  | 9.64  | 9.49  | 9.36  | 9.53  | 9.54  |
| 87 | 10.89 | 10.87 | 10.86 | 10.92 | 11.02 | ---   | 11.06 | 10.98 | 10.77 | 10.57 | 10.83 | 10.86 |
|    | 10.93 | 10.93 | 10.94 | 10.99 | 11.11 | ---   | 11.14 | 11.09 | 10.88 | 10.65 | 10.89 | 10.91 |
| 88 | 12.59 | 12.59 | 12.60 | 12.68 | 12.84 | 12.61 | 12.89 | 12.84 | 12.52 | 12.19 | 12.51 | 12.55 |
|    | 12.65 | 12.62 | 12.64 | 12.74 | 12.92 | 12.70 | 12.97 | 12.91 | 12.62 | 12.28 | 12.56 | 12.59 |
| 89 | 14.68 | 14.64 | 14.72 | 14.85 | 15.05 | 15.08 | 15.21 | 15.11 | 14.67 | 14.17 | 14.57 | 14.59 |
|    | 14.73 | 14.74 | 14.77 | 14.92 | 15.13 | 15.15 | 15.30 | 15.23 | 14.72 | 14.25 | 14.59 | 14.63 |
| 90 | 17.24 | 17.22 | 17.29 | 17.54 | 17.86 | 18.03 | 18.10 | 17.95 | 17.34 | 16.56 | 17.09 | 17.09 |
|    | 17.30 | 17.27 | 17.35 | 17.57 | 17.92 | 18.11 | 18.21 | 18.03 | 17.42 | 16.65 | 17.11 | 17.15 |
| 91 | 20.30 | 20.30 | 20.52 | 20.84 | 21.27 | 21.59 | 21.67 | 21.50 | 20.59 | 19.46 | 20.05 | 20.15 |
|    | 20.40 | 20.37 | 20.52 | 20.88 | 21.35 | 21.67 | 21.75 | 21.58 | 20.68 | 19.52 | 20.13 | 20.19 |
| 92 | 23.68 | 23.89 | 24.17 | 24.67 | 25.29 | 25.71 | 25.73 | 25.42 | 24.29 | 22.76 | 23.53 | 23.63 |
|    | 23.69 | 23.94 | 24.24 | 24.78 | 25.33 | 25.79 | 25.80 | 25.57 | 24.40 | 22.85 | 23.60 | 23.73 |
| 93 | ---   | 27.28 | 27.82 | 28.35 | 29.07 | 29.53 | 29.46 | 28.86 | 27.56 | 26.26 | 27.12 | ---   |
|    | ---   | 27.31 | 27.84 | 28.39 | 29.22 | 29.55 | 29.36 | 28.95 | 27.66 | 26.36 | 27.11 | ---   |
| 94 | ---   | 29.55 | 30.10 | 30.67 | 31.36 | 31.58 | 31.00 | 30.19 | 29.32 | 28.94 | 29.68 | ---   |
|    | ---   | 29.66 | 30.15 | 30.77 | 31.45 | 31.71 | 31.05 | 30.27 | 29.49 | 28.97 | 29.73 | ---   |

49 **Table S8** Monthly averaged O3 AMFs for Marambio for sunset (pm). Green background is for values  
50 obtained with surface albedo = 0.0, and white background for surface albedo = 1.0.

51

52 **S3. Belgrano monthly averaged AMF values:**

| SZA | Feb  | Mar   | Apr   | Aug | Sep   | Oct  |
|-----|------|-------|-------|-----|-------|------|
| 80  | 5.40 | 5.16  | ---   | --- | 5.29  | 5.11 |
|     | 5.68 | 5.40  | ---   | --- | 5.48  | 5.37 |
| 81  | 5.82 | 5.53  | ---   | --- | 5.53  | 5.46 |
|     | 6.11 | 5.77  | ---   | --- | 5.72  | 5.74 |
| 82  | 6.34 | 5.94  | 6.02  | --- | 6.01  | 5.83 |
|     | 6.65 | 6.20  | 6.25  | --- | 6.19  | 6.11 |
| 83  | 6.88 | 6.43  | 7.53  | --- | 6.51  | 6.21 |
|     | 7.18 | 6.69  | 7.79  | --- | 6.71  | 6.51 |
| 84  | 7.39 | 6.96  | 7.48  | --- | 7.08  | 6.69 |
|     | 7.71 | 7.23  | 7.71  | --- | 7.28  | 6.98 |
| 85  | 7.85 | 7.55  | 7.69  | --- | 7.75  | 7.20 |
|     | 8.18 | 7.82  | 7.93  | --- | 7.97  | 7.49 |
| 86  | 8.33 | 8.24  | 8.92  | --- | 8.66  | 7.73 |
|     | 8.64 | 8.52  | 9.15  | --- | 8.88  | 8.03 |
| 87  | 8.45 | 8.95  | 9.21  | --- | 9.37  | 8.03 |
|     | 8.76 | 9.23  | 9.48  | --- | 9.62  | 8.32 |
| 88  | 7.89 | 9.61  | 11.00 | --- | 10.18 | 8.30 |
|     | 8.21 | 9.98  | 11.28 | --- | 10.43 | 8.62 |
| 89  | 6.36 | 10.06 | 12.64 | --- | 10.84 | 8.11 |
|     | 6.65 | 10.45 | 13.07 | --- | 11.08 | 8.39 |
| 90  | 4.26 | 8.97  | 11.07 | --- | 10.83 | 7.34 |

|    |      |      |       |       |       |      |
|----|------|------|-------|-------|-------|------|
|    | 4.49 | 9.48 | 11.55 | ---   | 11.15 | 7.67 |
| 91 | 3.01 | 5.58 | 6.67  | 11.29 | 9.94  | 6.07 |
|    | 3.19 | 6.29 | 7.19  | 11.53 | 10.17 | 6.41 |
| 92 | 1.76 | 3.15 | 3.42  | 8.75  | 6.80  | 3.96 |
|    | 1.88 | 3.94 | 3.92  | 9.01  | 7.06  | 4.28 |
| 93 | 0.72 | 3.10 | 2.29  | 4.74  | 3.53  | 2.50 |
|    | 0.77 | 3.85 | 2.66  | 4.97  | 3.77  | 2.82 |
| 94 | 0.36 | 3.44 | 2.21  | 3.33  | 2.72  | 2.23 |
|    | 0.40 | 4.17 | 2.57  | 3.56  | 2.93  | 2.46 |

53 **Table S9** Monthly averaged OCIO AMFs for Belgrano for sunrise (am). Green background is for values  
54 obtained with surface albedo = 0.0, and white background for surface albedo = 1.0.

55

| SZA | Feb  | Mar   | Apr   | Aug   | Sep   | Oct  |
|-----|------|-------|-------|-------|-------|------|
| 80  | 5.11 | 5.11  | ---   | ---   | 5.30  | 5.13 |
|     | 5.38 | 5.33  | ---   | ---   | 5.49  | 5.37 |
| 81  | 5.48 | 5.45  | ---   | ---   | 5.53  | 5.49 |
|     | 5.75 | 5.66  | ---   | ---   | 5.73  | 5.75 |
| 82  | 5.87 | 5.87  | 6.02  | ---   | 6.00  | 5.87 |
|     | 6.16 | 6.11  | 6.25  | ---   | 6.18  | 6.12 |
| 83  | 6.33 | 6.50  | 7.36  | ---   | 6.53  | 6.26 |
|     | 6.60 | 6.73  | 7.61  | ---   | 6.72  | 6.53 |
| 84  | 6.86 | 7.10  | 7.22  | ---   | 7.07  | 6.73 |
|     | 7.16 | 7.34  | 7.45  | ---   | 7.28  | 7.02 |
| 85  | 7.45 | 7.75  | 7.34  | ---   | 7.77  | 7.28 |
|     | 7.76 | 8.00  | 7.57  | ---   | 7.99  | 7.56 |
| 86  | 8.09 | 8.44  | 8.15  | ---   | 8.66  | 7.80 |
|     | 8.40 | 8.72  | 8.38  | ---   | 8.93  | 8.10 |
| 87  | 8.53 | 9.03  | 8.42  | ---   | 9.39  | 8.14 |
|     | 8.84 | 9.32  | 8.64  | ---   | 9.64  | 8.43 |
| 88  | 8.95 | 9.77  | 9.59  | ---   | 10.22 | 8.45 |
|     | 9.31 | 10.07 | 9.78  | ---   | 10.48 | 8.76 |
| 89  | 9.18 | 10.25 | 10.34 | ---   | 10.93 | 8.26 |
|     | 9.59 | 10.52 | 10.62 | ---   | 11.15 | 8.59 |
| 90  | 8.53 | 9.72  | 9.28  | ---   | 10.86 | 7.56 |
|     | 8.99 | 10.06 | 9.62  | ---   | 11.07 | 7.88 |
| 91  | 7.85 | 8.54  | 7.21  | 11.04 | 9.69  | 6.19 |
|     | 8.31 | 8.91  | 7.58  | 11.29 | 9.98  | 6.51 |
| 92  | 7.35 | 6.39  | 4.73  | 8.10  | 6.68  | 3.86 |
|     | 7.86 | 6.75  | 5.05  | 8.34  | 6.95  | 4.16 |
| 93  | 7.49 | 5.36  | 3.42  | 5.49  | 4.52  | 2.97 |
|     | 8.04 | 5.69  | 3.70  | 5.70  | 4.76  | 3.25 |
| 94  | 6.37 | 4.71  | 2.80  | 4.07  | 3.46  | 2.52 |
|     | 6.93 | 5.03  | 3.08  | 4.28  | 3.67  | 2.78 |

56 **Table S10** Monthly averaged OCIO AMFs for Belgrano for sunset (pm). Green background is for values  
57 obtained with surface albedo = 0.0, and white background for surface albedo = 1.0.

58

| SZA | Feb  | Mar  | Apr | Aug | Sep  | Oct  |
|-----|------|------|-----|-----|------|------|
| 80  | 4.86 | 5.08 | --- | --- | 5.20 | 5.19 |

|    |       |        |       |       |       |       |
|----|-------|--------|-------|-------|-------|-------|
|    | 5.14  | 5.34   | ---   | ---   | 5.41  | 5.39  |
| 81 | 5.20  | 5.45   | ---   | ---   | 5.56  | 5.57  |
|    | 5.48  | 5.70   | ---   | ---   | 5.77  | 5.78  |
| 82 | 5.60  | 5.86   | ---   | ---   | 6.01  | 6.03  |
|    | 5.89  | 6.12   | ---   | ---   | 6.21  | 6.22  |
| 83 | 6.08  | 6.37   | ---   | ---   | 6.56  | 6.55  |
|    | 6.36  | 6.64   | ---   | ---   | 6.74  | 6.76  |
| 84 | 6.62  | 6.95   | ---   | ---   | 7.19  | 7.19  |
|    | 6.91  | 7.23   | ---   | ---   | 7.39  | 7.39  |
| 85 | 7.24  | 7.63   | ---   | ---   | 7.92  | 7.93  |
|    | 7.53  | 7.90   | ---   | ---   | 8.14  | 8.13  |
| 86 | 8.07  | 8.49   | ---   | ---   | 8.85  | 8.80  |
|    | 8.37  | 8.76   | ---   | ---   | 9.06  | 9.03  |
| 87 | 9.15  | 9.61   | ---   | ---   | 9.92  | 9.89  |
|    | 9.47  | 9.89   | ---   | ---   | 10.15 | 10.11 |
| 88 | 10.41 | 11.04  | 10.86 | ---   | 11.17 | 11.12 |
|    | 10.74 | 11.28  | 11.14 | ---   | 11.41 | 11.38 |
| 89 | 12.30 | 12.95  | 12.76 | ---   | 12.51 | 12.54 |
|    | 12.64 | 13.26  | 13.07 | ---   | 12.72 | 12.77 |
| 90 | 15.22 | 16.13  | 15.43 | ---   | 14.04 | 14.19 |
|    | 15.64 | 16.42  | 15.68 | ---   | 14.28 | 14.46 |
| 91 | ---   | 21.47  | 19.07 | 16.88 | 16.44 | 16.21 |
|    | ---   | 21.73  | 19.40 | 17.15 | 16.70 | 16.48 |
| 92 | ---   | 34.02  | 27.63 | 21.07 | 21.26 | 20.10 |
|    | ---   | 34.31  | 28.06 | 21.32 | 21.52 | 20.31 |
| 93 | ---   | 65.29  | 50.59 | 35.32 | 38.95 | 34.91 |
|    | ---   | 65.82  | 51.26 | 35.91 | 39.47 | 35.44 |
| 94 | ---   | 110.33 | 78.12 | 67.27 | 77.92 | 54.98 |
|    | ---   | 110.83 | 79.36 | 67.79 | 79.01 | 55.46 |

59 **Table S11** Monthly averaged BrO AMFs for Belgrano for sunrise (am). Green background is for values  
60 obtained with surface albedo = 0.0, and white background for surface albedo = 1.0.

61

| SZA | Feb   | Mar   | Apr   | Aug | Sep   | Oct   |
|-----|-------|-------|-------|-----|-------|-------|
| 80  | 5.02  | 5.10  | ---   | --- | 5.20  | 5.19  |
|     | 5.31  | 5.35  | ---   | --- | 5.40  | 5.38  |
| 81  | 5.37  | 5.46  | ---   | --- | 5.57  | 5.58  |
|     | 5.66  | 5.72  | ---   | --- | 5.76  | 5.77  |
| 82  | 5.76  | 5.86  | ---   | --- | 6.01  | 6.04  |
|     | 6.06  | 6.13  | ---   | --- | 6.21  | 6.23  |
| 83  | 6.23  | 6.39  | ---   | --- | 6.56  | 6.56  |
|     | 6.52  | 6.66  | ---   | --- | 6.76  | 6.76  |
| 84  | 6.76  | 6.95  | ---   | --- | 7.19  | 7.19  |
|     | 7.05  | 7.22  | ---   | --- | 7.38  | 7.40  |
| 85  | 7.35  | 7.60  | ---   | --- | 7.91  | 7.94  |
|     | 7.64  | 7.88  | ---   | --- | 8.14  | 8.14  |
| 86  | 8.07  | 8.39  | ---   | --- | 8.86  | 8.81  |
|     | 8.37  | 8.64  | ---   | --- | 9.09  | 9.03  |
| 87  | 8.99  | 9.35  | ---   | --- | 9.93  | 9.86  |
|     | 9.30  | 9.63  | ---   | --- | 10.17 | 10.10 |
| 88  | 10.01 | 10.51 | 10.57 | --- | 11.18 | 11.15 |
|     | 10.33 | 10.82 | 10.85 | --- | 11.44 | 11.38 |

|    |       |       |       |       |       |       |
|----|-------|-------|-------|-------|-------|-------|
| 89 | 11.47 | 11.90 | 11.95 | ---   | 12.55 | 12.55 |
|    | 11.78 | 12.19 | 12.26 | ---   | 12.80 | 12.83 |
| 90 | 13.64 | 13.70 | 13.26 | ---   | 13.90 | 14.16 |
|    | 14.01 | 13.98 | 13.53 | ---   | 14.19 | 14.44 |
| 91 | ---   | 16.20 | 14.52 | 16.44 | 15.50 | 15.66 |
|    | ---   | 16.55 | 14.83 | 16.65 | 15.76 | 15.91 |
| 92 | ---   | 21.78 | 16.87 | 18.48 | 17.04 | 17.30 |
|    | ---   | 22.14 | 17.19 | 18.75 | 17.35 | 17.53 |
| 93 | ---   | 31.77 | 20.34 | 21.77 | 19.39 | 20.60 |
|    | ---   | 32.22 | 20.66 | 22.01 | 19.79 | 20.74 |
| 94 | ---   | 48.35 | 25.87 | 27.38 | 23.59 | 25.50 |
|    | ---   | 48.85 | 26.33 | 27.90 | 23.88 | 25.93 |

62 **Table S12** Monthly averaged BrO AMFs for Belgrano for sunset (pm). Green background is for values  
63 obtained with surface albedo = 0.0, and white background for surface albedo = 1.0.

64

| SZA | Feb   | Mar   | Apr   | Aug   | Sep   | Oct   |
|-----|-------|-------|-------|-------|-------|-------|
| 80  | 5.32  | 5.32  | ---   | ---   | 5.02  | 5.11  |
|     | 5.38  | 5.39  | ---   | ---   | 5.15  | 5.20  |
| 81  | 5.76  | 5.70  | ---   | ---   | 5.58  | 5.49  |
|     | 5.82  | 5.77  | ---   | ---   | 5.71  | 5.59  |
| 82  | 6.28  | 6.19  | ---   | ---   | 6.08  | 5.98  |
|     | 6.33  | 6.25  | ---   | ---   | 6.21  | 6.08  |
| 83  | 6.89  | 6.69  | ---   | ---   | 6.62  | 6.54  |
|     | 6.93  | 6.75  | ---   | ---   | 6.75  | 6.64  |
| 84  | 7.61  | 7.38  | ---   | ---   | 7.41  | 7.23  |
|     | 7.65  | 7.43  | ---   | ---   | 7.55  | 7.31  |
| 85  | 8.49  | 8.23  | ---   | ---   | 8.38  | 8.05  |
|     | 8.52  | 8.27  | ---   | ---   | 8.52  | 8.13  |
| 86  | 9.54  | 9.25  | ---   | ---   | 9.21  | 9.05  |
|     | 9.57  | 9.28  | ---   | ---   | 9.35  | 9.11  |
| 87  | 10.80 | 10.33 | ---   | ---   | 10.11 | 10.08 |
|     | 10.82 | 10.36 | ---   | ---   | 10.25 | 10.17 |
| 88  | 12.50 | 11.67 | 13.54 | ---   | 11.28 | 11.35 |
|     | 12.53 | 11.70 | 13.56 | ---   | 11.39 | 11.41 |
| 89  | 14.47 | 13.32 | 14.99 | ---   | 12.68 | 13.22 |
|     | 14.51 | 13.37 | 15.03 | ---   | 12.82 | 13.32 |
| 90  | 16.98 | 15.41 | 17.06 | ---   | 14.29 | 15.64 |
|     | 16.98 | 15.44 | 17.14 | ---   | 14.42 | 15.68 |
| 91  | ---   | 17.56 | 19.44 | 16.63 | 15.77 | 17.73 |
|     | ---   | 17.61 | 19.49 | 16.84 | 15.87 | 17.80 |
| 92  | ---   | 19.35 | 21.54 | 17.97 | 16.96 | 19.64 |
|     | ---   | 19.38 | 21.58 | 18.20 | 17.05 | 19.78 |
| 93  | ---   | 20.17 | 20.98 | 18.35 | 17.33 | 20.53 |
|     | ---   | 20.12 | 20.94 | 18.46 | 17.44 | 20.62 |
| 94  | ---   | 21.11 | 20.63 | 18.31 | 18.13 | 21.67 |
|     | ---   | 21.04 | 20.60 | 18.37 | 18.12 | 21.75 |

65 **Table S13** Monthly averaged NO<sub>2</sub> AMFs for Belgrano for sunrise (am). Green background is for values  
66 obtained with surface albedo = 0.0, and white background for surface albedo = 1.0.

67

| SZA | Feb   | Mar   | Apr   | Aug   | Sep   | Oct   |
|-----|-------|-------|-------|-------|-------|-------|
| 80  | 5.14  | 5.28  | ---   | ---   | 5.07  | 5.12  |
|     | 5.21  | 5.35  | ---   | ---   | 5.16  | 5.20  |
| 81  | 5.58  | 5.67  | ---   | ---   | 5.59  | 5.52  |
|     | 5.63  | 5.72  | ---   | ---   | 5.69  | 5.59  |
| 82  | 6.09  | 6.15  | ---   | ---   | 6.08  | 6.02  |
|     | 6.13  | 6.19  | ---   | ---   | 6.18  | 6.08  |
| 83  | 6.68  | 6.63  | ---   | ---   | 6.60  | 6.59  |
|     | 6.73  | 6.67  | ---   | ---   | 6.69  | 6.66  |
| 84  | 7.40  | 7.31  | ---   | ---   | 7.41  | 7.30  |
|     | 7.44  | 7.36  | ---   | ---   | 7.50  | 7.36  |
| 85  | 8.28  | 8.17  | ---   | ---   | 8.38  | 8.16  |
|     | 8.31  | 8.21  | ---   | ---   | 8.47  | 8.20  |
| 86  | 9.33  | 9.19  | ---   | ---   | 9.14  | 9.16  |
|     | 9.36  | 9.22  | ---   | ---   | 9.22  | 9.21  |
| 87  | 10.57 | 10.27 | ---   | ---   | 10.00 | 10.25 |
|     | 10.59 | 10.31 | ---   | ---   | 10.08 | 10.30 |
| 88  | 12.21 | 11.66 | 13.13 | ---   | 11.20 | 11.60 |
|     | 12.24 | 11.68 | 13.17 | ---   | 11.26 | 11.63 |
| 89  | 14.14 | 13.38 | 14.66 | ---   | 12.67 | 13.53 |
|     | 14.17 | 13.38 | 14.67 | ---   | 12.73 | 13.57 |
| 90  | 16.58 | 15.48 | 16.80 | ---   | 14.40 | 15.94 |
|     | 16.58 | 15.53 | 16.81 | ---   | 14.46 | 16.00 |
| 91  | ---   | 17.77 | 19.21 | 15.99 | 16.11 | 18.07 |
|     | ---   | 17.78 | 19.24 | 16.13 | 16.13 | 18.11 |
| 92  | ---   | 19.71 | 21.43 | 17.36 | 17.57 | 20.21 |
|     | ---   | 19.72 | 21.43 | 17.53 | 17.56 | 20.22 |
| 93  | ---   | 20.62 | 21.13 | 18.65 | 18.66 | 21.44 |
|     | ---   | 20.56 | 21.12 | 18.75 | 18.69 | 21.34 |
| 94  | ---   | 21.68 | 21.12 | 19.65 | 20.13 | 22.89 |
|     | ---   | 21.65 | 21.14 | 19.82 | 20.12 | 22.83 |

68 **Table S14** Monthly averaged NO<sub>2</sub> AMFs for Belgrano for sunset (pm). Green background is for values  
69 obtained with surface albedo = 0.0, and white background for surface albedo = 1.0.

70

| SZA | Feb   | Mar   | Apr | Aug | Sep   | Oct   |
|-----|-------|-------|-----|-----|-------|-------|
| 80  | 5.10  | 5.11  | --- | --- | 4.94  | 4.92  |
|     | 5.27  | 5.28  | --- | --- | 5.18  | 5.16  |
| 81  | 5.53  | 5.45  | --- | --- | 5.28  | 5.32  |
|     | 5.70  | 5.61  | --- | --- | 5.52  | 5.56  |
| 82  | 6.06  | 5.94  | --- | --- | 5.76  | 5.81  |
|     | 6.22  | 6.10  | --- | --- | 5.99  | 6.03  |
| 83  | 6.68  | 6.64  | --- | --- | 6.37  | 6.39  |
|     | 6.83  | 6.79  | --- | --- | 6.58  | 6.59  |
| 84  | 7.42  | 7.44  | --- | --- | 7.08  | 7.08  |
|     | 7.56  | 7.57  | --- | --- | 7.26  | 7.27  |
| 85  | 8.34  | 8.36  | --- | --- | 7.89  | 7.91  |
|     | 8.47  | 8.49  | --- | --- | 8.06  | 8.09  |
| 86  | 9.48  | 9.52  | --- | --- | 9.17  | 8.93  |
|     | 9.57  | 9.62  | --- | --- | 9.32  | 9.07  |
| 87  | 10.89 | 10.94 | --- | --- | 10.61 | 10.13 |
|     | 10.97 | 11.03 | --- | --- | 10.74 | 10.27 |

|    |       |       |       |       |       |       |
|----|-------|-------|-------|-------|-------|-------|
| 88 | 12.68 | 12.75 | 13.24 | ---   | 12.33 | 11.61 |
|    | 12.74 | 12.81 | 13.31 | ---   | 12.43 | 11.71 |
| 89 | 14.96 | 14.93 | 15.31 | ---   | 14.42 | 13.40 |
|    | 15.04 | 15.01 | 15.43 | ---   | 14.52 | 13.50 |
| 90 | 17.64 | 17.67 | 18.16 | ---   | 17.01 | 15.56 |
|    | 17.73 | 17.70 | 18.19 | ---   | 17.14 | 15.65 |
| 91 | ---   | 20.95 | 21.50 | 21.07 | 20.16 | 17.88 |
|    | ---   | 21.01 | 21.56 | 21.17 | 20.25 | 17.98 |
| 92 | ---   | 24.67 | 25.56 | 25.22 | 23.71 | 20.73 |
|    | ---   | 24.73 | 25.64 | 25.26 | 23.76 | 20.78 |
| 93 | ---   | 28.06 | 29.14 | 27.97 | 26.94 | 24.20 |
|    | ---   | 28.12 | 29.25 | 28.16 | 27.02 | 24.29 |
| 94 | ---   | 30.02 | 31.07 | 29.01 | 28.96 | 27.88 |
|    | ---   | 30.03 | 31.06 | 29.15 | 28.97 | 27.94 |

71 **Table S15** Monthly averaged O3 AMFs for Belgrano for sunrise (am). Green background is for values  
72 obtained with surface albedo = 0.0, and white background for surface albedo = 1.0.

73

| SZA | Feb   | Mar   | Apr   | Aug   | Sep   | Oct   |
|-----|-------|-------|-------|-------|-------|-------|
| 80  | 5.08  | 5.10  | ---   | ---   | 4.93  | 4.92  |
|     | 5.25  | 5.28  | ---   | ---   | 5.17  | 5.15  |
| 81  | 5.51  | 5.45  | ---   | ---   | 5.28  | 5.33  |
|     | 5.68  | 5.62  | ---   | ---   | 5.52  | 5.56  |
| 82  | 6.04  | 5.94  | ---   | ---   | 5.77  | 5.81  |
|     | 6.21  | 6.11  | ---   | ---   | 5.98  | 6.03  |
| 83  | 6.67  | 6.64  | ---   | ---   | 6.37  | 6.39  |
|     | 6.82  | 6.79  | ---   | ---   | 6.59  | 6.60  |
| 84  | 7.41  | 7.44  | ---   | ---   | 7.07  | 7.09  |
|     | 7.56  | 7.57  | ---   | ---   | 7.26  | 7.27  |
| 85  | 8.34  | 8.36  | ---   | ---   | 7.89  | 7.93  |
|     | 8.47  | 8.49  | ---   | ---   | 8.06  | 8.08  |
| 86  | 9.49  | 9.52  | ---   | ---   | 9.17  | 8.93  |
|     | 9.58  | 9.63  | ---   | ---   | 9.34  | 9.08  |
| 87  | 10.91 | 10.95 | ---   | ---   | 10.61 | 10.16 |
|     | 10.99 | 11.03 | ---   | ---   | 10.75 | 10.29 |
| 88  | 12.71 | 12.74 | 13.22 | ---   | 12.32 | 11.62 |
|     | 12.76 | 12.80 | 13.32 | ---   | 12.43 | 11.73 |
| 89  | 15.00 | 14.98 | 15.37 | ---   | 14.40 | 13.41 |
|     | 15.08 | 15.00 | 15.45 | ---   | 14.51 | 13.51 |
| 90  | 17.69 | 17.60 | 18.10 | ---   | 16.96 | 15.56 |
|     | 17.78 | 17.68 | 18.19 | ---   | 17.06 | 15.64 |
| 91  | ---   | 20.95 | 21.50 | 21.11 | 20.08 | 17.86 |
|     | ---   | 20.99 | 21.57 | 21.16 | 20.16 | 17.96 |
| 92  | ---   | 24.69 | 25.64 | 25.26 | 23.57 | 20.65 |
|     | ---   | 24.77 | 25.66 | 25.27 | 23.69 | 20.70 |
| 93  | ---   | 28.06 | 29.30 | 28.01 | 26.84 | 24.31 |
|     | ---   | 28.14 | 29.17 | 28.20 | 26.93 | 24.38 |
| 94  | ---   | 30.09 | 31.08 | 29.03 | 28.85 | 28.03 |
|     | ---   | 30.16 | 31.08 | 29.15 | 28.97 | 28.11 |

74 **Table S16** Monthly averaged O3 AMFs for Belgrano for sunset (pm). Green background is for values  
75 obtained with surface albedo = 0.0, and white background for surface albedo = 1.0.

76 **S4. Marambio monthly averaged VCD values:**

| SZA | Jan     | Feb     | Mar     | Apr     | May     | Jun     | Jul      | Aug     | Sep     | Oct     | Nov     | Dec     |
|-----|---------|---------|---------|---------|---------|---------|----------|---------|---------|---------|---------|---------|
| 80  | 6.24E10 | 9.68E10 | 1.63E11 | 3.11E11 | ---     | ---     | ---      | 6.53E12 | 5.23E12 | 1.39E12 | 1.13E11 | 7.32E10 |
| 81  | 5.94E10 | 9.18E10 | 1.54E11 | 2.93E11 | ---     | ---     | ---      | 7.05E12 | 5.36E12 | 1.42E12 | 1.08E11 | 7.00E10 |
| 82  | 5.59E10 | 8.59E10 | 1.42E11 | 2.73E11 | ---     | ---     | ---      | 7.78E12 | 5.51E12 | 1.45E12 | 1.03E11 | 6.61E10 |
| 83  | 5.25E10 | 8.01E10 | 1.31E11 | 2.53E11 | 4.80E11 | ---     | ---      | 8.07E12 | 5.74E12 | 1.50E12 | 9.72E10 | 6.25E10 |
| 84  | 4.88E10 | 7.36E10 | 1.18E11 | 2.29E11 | 4.60E11 | ---     | ---      | 8.41E12 | 5.98E12 | 1.56E12 | 9.10E10 | 5.87E10 |
| 85  | 4.45E10 | 6.59E10 | 1.03E11 | 2.02E11 | 4.55E11 | ---     | ---      | 8.78E12 | 6.24E12 | 1.61E12 | 8.37E10 | 5.42E10 |
| 86  | 3.90E10 | 5.67E10 | 8.68E10 | 1.72E11 | 1.18E12 | ---     | 8.87E12  | 9.18E12 | 6.52E12 | 1.67E12 | 7.43E10 | 4.84E10 |
| 87  | 3.41E10 | 4.85E10 | 7.22E10 | 1.48E11 | 1.23E12 | ---     | 1.02E13  | 1.00E13 | 7.11E12 | 1.81E12 | 6.61E10 | 4.33E10 |
| 88  | 2.90E10 | 4.03E10 | 5.80E10 | 1.25E11 | 1.32E12 | 6.17E12 | 1.18E13  | 1.11E13 | 7.87E12 | 1.99E12 | 5.78E10 | 3.81E10 |
| 89  | 2.39E10 | 3.36E10 | 4.87E10 | 1.14E11 | 1.46E12 | 6.93E12 | 1.33E13  | 1.24E13 | 8.83E12 | 2.25E12 | 5.02E10 | 3.29E10 |
| 90  | 2.01E10 | 3.85E10 | 6.68E10 | 1.92E11 | 1.81E12 | 8.09E12 | 1.559E13 | 1.43E13 | 1.02E13 | 2.60E12 | 5.06E10 | 2.82E10 |
| 91  | 2.19E10 | 7.41E10 | 1.58E11 | 6.18E11 | 3.27E12 | 1.07E13 | 2.04E13  | 2.00E13 | 1.55E13 | 3.94E12 | 7.88E10 | 2.55E10 |
| 92  | 3.47E10 | 1.53E11 | 3.61E11 | 1.87E12 | 9.26E12 | 2.04E13 | 3.74E13  | 4.05E13 | 3.52E13 | 1.00E13 | 1.59E11 | 2.91E10 |
| 93  | 5.69E10 | 2.55E11 | 6.33E11 | 4.07E12 | 2.53E13 | 5.58E13 | 9.25E13  | 9.37E13 | 8.16E13 | 2.44E13 | 2.77E11 | ---     |
| 94  | 9.96E10 | 3.80E11 | 8.94E11 | 5.66E12 | 3.88E13 | 9.07E13 | 1.45E14  | 1.37E14 | 1.17E14 | 3.49E13 | 4.51E11 | ---     |

77 **Table S17. Monthly averaged OCIO VCDs for Marambio for sunrise (am).**

| SZA | Jan     | Feb     | Mar     | Apr     | May     | Jun     | Jul     | Aug     | Sep     | Oct     | Nov     | Dec     |
|-----|---------|---------|---------|---------|---------|---------|---------|---------|---------|---------|---------|---------|
| 80  | 7.49E10 | 9.02E10 | 1.64E11 | 3.36E11 | ---     | ---     | ---     | 6.44E12 | 4.92E12 | 1.31E12 | 1.19E11 | 8.63E10 |
| 81  | 7.25E10 | 8.81E10 | 1.62E11 | 3.35E11 | ---     | ---     | ---     | 6.94E12 | 5.04E12 | 1.34E12 | 1.16E11 | 8.40E10 |
| 82  | 7.01E10 | 8.61E10 | 1.60E11 | 3.35E11 | ---     | ---     | ---     | 7.65E12 | 5.19E12 | 1.37E12 | 1.14E11 | 8.18E10 |
| 83  | 6.78E10 | 8.44E10 | 1.59E11 | 3.38E11 | 5.90E11 | ---     | ---     | 7.91E12 | 5.40E12 | 1.43E12 | 1.12E11 | 7.97E10 |
| 84  | 6.46E10 | 8.19E10 | 1.57E11 | 3.40E11 | 6.05E11 | ---     | ---     | 8.23E12 | 5.64E12 | 1.49E12 | 1.09E11 | 7.68E10 |
| 85  | 6.10E10 | 7.90E10 | 1.55E11 | 3.42E11 | 6.47E11 | ---     | ---     | 8.58E12 | 5.90E12 | 1.56E12 | 1.06E11 | 7.33E10 |
| 86  | 5.74E10 | 7.62E10 | 1.53E11 | 3.47E11 | 1.42E12 | ---     | 8.77E12 | 9.03E12 | 6.24E12 | 1.65E12 | 1.02E11 | 6.98E10 |
| 87  | 5.41E10 | 7.46E10 | 1.56E11 | 3.68E11 | 1.57E12 | ---     | 1.02E13 | 9.94E12 | 6.92E12 | 1.84E12 | 1.01E11 | 6.69E10 |
| 88  | 4.89E10 | 7.14E10 | 1.58E11 | 3.92E11 | 1.76E12 | 6.34E12 | 1.18E13 | 1.11E13 | 7.81E12 | 2.08E12 | 9.61E10 | 6.18E10 |
| 89  | 4.31E10 | 6.75E10 | 1.61E11 | 4.31E11 | 2.05E12 | 7.27E12 | 1.35E13 | 1.28E13 | 9.04E12 | 2.42E12 | 9.02E10 | 5.56E10 |
| 90  | 3.71E10 | 6.46E10 | 1.74E11 | 5.18E11 | 2.61E12 | 8.86E12 | 1.66E13 | 1.56E13 | 1.10E13 | 2.98E12 | 8.42E10 | 4.89E10 |
| 91  | 3.15E10 | 6.42E10 | 2.04E11 | 6.98E11 | 3.78E12 | 1.22E13 | 2.27E13 | 2.13E13 | 1.52E13 | 4.13E12 | 8.26E10 | 4.29E10 |
| 92  | 2.59E10 | 6.76E10 | 2.67E11 | 1.09E12 | 6.50E12 | 1.94E13 | 3.57E13 | 3.29E13 | 2.33E13 | 6.49E12 | 8.44E10 | 3.58E10 |
| 93  | ---     | 7.83E10 | 3.47E11 | 1.64E12 | 1.08E13 | 3.07E13 | 5.55E13 | 5.01E13 | 3.55E13 | 9.94E12 | 1.09E11 | ---     |
| 94  | ---     | 1.02E11 | 4.44E11 | 2.34E12 | 1.69E13 | 4.69E13 | 8.19E13 | 7.18E13 | 5.07E13 | 1.45E13 | 1.56E11 | ---     |

78 **Table S18. Monthly averaged OCIO VCDs for Marambio for sunset (pm).**

| SZA | Jan     | Feb     | Mar     | Apr     | May     | Jun     | Jul     | Aug     | Sep     | Oct     | Nov     | Dec     |
|-----|---------|---------|---------|---------|---------|---------|---------|---------|---------|---------|---------|---------|
| 80  | 2.85E13 | 3.10E13 | 3.40E13 | 3.62E13 | ---     | ---     | ---     | 3.60E13 | 3.43E13 | 3.31E13 | 3.14E13 | 2.99E13 |
| 81  | 2.79E13 | 3.06E13 | 3.36E13 | 3.61E13 | ---     | ---     | ---     | 3.65E13 | 3.43E13 | 3.29E13 | 3.09E13 | 2.93E13 |
| 82  | 2.72E13 | 2.99E13 | 3.31E13 | 3.58E13 | ---     | ---     | ---     | 3.70E13 | 3.43E13 | 3.26E13 | 3.02E13 | 2.85E13 |
| 83  | 2.62E13 | 2.91E13 | 3.23E13 | 3.53E13 | 3.80E13 | ---     | ---     | 3.71E13 | 3.42E13 | 3.21E13 | 2.93E13 | 2.75E13 |
| 84  | 2.52E13 | 2.81E13 | 3.14E13 | 3.46E13 | 3.74E13 | ---     | ---     | 3.70E13 | 3.40E13 | 3.16E13 | 2.83E13 | 2.64E13 |
| 85  | 2.40E13 | 2.69E13 | 3.01E13 | 3.35E13 | 3.74E13 | ---     | ---     | 3.70E13 | 3.38E13 | 3.09E13 | 2.71E13 | 2.52E13 |
| 86  | 2.25E13 | 2.54E13 | 2.84E13 | 3.19E13 | 3.79E13 | ---     | 3.75E13 | 3.67E13 | 3.35E13 | 2.98E13 | 2.55E13 | 2.36E13 |
| 87  | 2.04E13 | 2.32E13 | 2.61E13 | 2.95E13 | 3.63E13 | ---     | 3.67E13 | 3.61E13 | 3.28E13 | 2.84E13 | 2.33E13 | 2.14E13 |
| 88  | 1.82E13 | 2.08E13 | 2.32E13 | 2.64E13 | 3.40E13 | 3.57E13 | 3.64E13 | 3.53E13 | 3.20E13 | 2.69E13 | 2.09E13 | 1.89E13 |
| 89  | 1.57E13 | 1.80E13 | 1.99E13 | 2.26E13 | 3.06E13 | 3.40E13 | 3.55E13 | 3.41E13 | 3.07E13 | 2.52E13 | 1.82E13 | 1.63E13 |
| 90  | 1.30E13 | 1.47E13 | 1.59E13 | 1.80E13 | 2.58E13 | 3.09E13 | 3.35E13 | 3.14E13 | 2.82E13 | 2.27E13 | 1.52E13 | 1.35E13 |
| 91  | 9.87E12 | 1.09E13 | 1.14E13 | 1.27E13 | 1.95E13 | 2.52E13 | 2.81E13 | 2.55E13 | 2.27E13 | 1.81E13 | 1.15E13 | 1.03E13 |
| 92  | 7.05E12 | 7.37E12 | 7.32E12 | 7.85E12 | 1.28E13 | 1.75E13 | 1.96E13 | 1.69E13 | 1.50E13 | 1.19E13 | 8.00E12 | 7.52E12 |
| 93  | 4.56E12 | 4.42E12 | 4.11E12 | 4.11E12 | 6.84E12 | 8.71E12 | 9.19E12 | 7.55E12 | 6.94E12 | 5.89E12 | 4.94E12 | ---     |
| 94  | 3.22E12 | 2.77E12 | 2.41E12 | 2.31E12 | 4.17E12 | 4.39E12 | 3.96E12 | 3.26E12 | 3.22E12 | 3.12E12 | 3.31E12 | ---     |

79 **Table S19. Monthly averaged BrO VCDs for Marambio for sunrise (am).**

| SZA | Jan     | Feb     | Mar     | Apr     | May     | Jun     | Jul     | Aug     | Sep     | Oct     | Nov     | Dec     |
|-----|---------|---------|---------|---------|---------|---------|---------|---------|---------|---------|---------|---------|
| 80  | 2.81E13 | 2.82E13 | 3.09E13 | 3.40E13 | ---     | ---     | ---     | 3.57E13 | 3.34E13 | 3.17E13 | 2.96E13 | 2.92E13 |
| 81  | 2.75E13 | 2.78E13 | 3.06E13 | 3.37E13 | ---     | ---     | ---     | 3.62E13 | 3.34E13 | 3.16E13 | 2.91E13 | 2.87E13 |
| 82  | 2.69E13 | 2.73E13 | 3.02E13 | 3.35E13 | ---     | ---     | ---     | 3.66E13 | 3.33E13 | 3.14E13 | 2.86E13 | 2.81E13 |
| 83  | 2.60E13 | 2.66E13 | 2.96E13 | 3.30E13 | 3.66E13 | ---     | ---     | 3.66E13 | 3.32E13 | 3.10E13 | 2.78E13 | 2.73E13 |
| 84  | 2.49E13 | 2.58E13 | 2.89E13 | 3.25E13 | 3.59E13 | ---     | ---     | 3.65E13 | 3.31E13 | 3.06E13 | 2.70E13 | 2.63E13 |
| 85  | 2.38E13 | 2.49E13 | 2.82E13 | 3.20E13 | 3.60E13 | ---     | ---     | 3.63E13 | 3.29E13 | 3.02E13 | 2.60E13 | 2.52E13 |
| 86  | 2.25E13 | 2.38E13 | 2.73E13 | 3.13E13 | 3.70E13 | ---     | 3.70E13 | 3.62E13 | 3.27E13 | 2.96E13 | 2.48E13 | 2.40E13 |
| 87  | 2.06E13 | 2.22E13 | 2.59E13 | 3.02E13 | 3.63E13 | ---     | 3.63E13 | 3.56E13 | 3.22E13 | 2.86E13 | 2.30E13 | 2.21E13 |
| 88  | 1.83E13 | 2.02E13 | 2.41E13 | 2.87E13 | 3.53E13 | 3.57E13 | 3.59E13 | 3.49E13 | 3.14E13 | 2.71E13 | 2.08E13 | 1.97E13 |
| 89  | 1.58E13 | 1.79E13 | 2.19E13 | 2.68E13 | 3.41E13 | 3.48E13 | 3.51E13 | 3.40E13 | 3.06E13 | 2.54E13 | 1.82E13 | 1.71E13 |
| 90  | 1.32E13 | 1.53E13 | 1.93E13 | 2.45E13 | 3.26E13 | 3.38E13 | 3.42E13 | 3.30E13 | 2.95E13 | 2.32E13 | 1.53E13 | 1.42E13 |
| 91  | 1.02E13 | 1.22E13 | 1.60E13 | 2.14E13 | 3.02E13 | 3.17E13 | 3.20E13 | 3.09E13 | 2.75E13 | 2.02E13 | 1.20E13 | 1.11E13 |
| 92  | 7.37E12 | 9.04E12 | 1.23E13 | 1.76E13 | 2.67E13 | 2.86E13 | 2.86E13 | 2.77E13 | 2.48E13 | 1.67E13 | 8.80E12 | 7.93E12 |
| 93  | ---     | 6.31E12 | 8.90E12 | 1.36E13 | 2.25E13 | 2.42E13 | 2.37E13 | 2.33E13 | 2.10E13 | 1.31E13 | 6.20E12 | ---     |
| 94  | ---     | 4.47E12 | 6.31E12 | 1.02E13 | 1.84E13 | 1.97E13 | 1.88E13 | 1.89E13 | 1.75E13 | 1.02E13 | 4.47E12 | ---     |

80 Table S20. Monthly averaged BrO VCDs for Marambio for sunset (pm).

| SZA | Jan     | Feb     | Mar     | Apr     | May     | Jun     | Jul     | Aug     | Sep     | Oct     | Nov     | Dec     |
|-----|---------|---------|---------|---------|---------|---------|---------|---------|---------|---------|---------|---------|
| 80  | 4.45E15 | 3.07E15 | 2.26E15 | 1.54E15 | ---     | ---     | ---     | 7.24E14 | 9.62E14 | 1.22E15 | 2.99E15 | 4.30E15 |
| 81  | 4.49E15 | 3.08E15 | 2.26E15 | 1.53E15 | ---     | ---     | ---     | 7.16E14 | 9.61E14 | 1.23E15 | 3.01E15 | 4.34E15 |
| 82  | 4.53E15 | 3.10E15 | 2.27E15 | 1.52E15 | ---     | ---     | ---     | 6.95E14 | 9.60E14 | 1.23E15 | 3.04E15 | 4.39E15 |
| 83  | 4.59E15 | 3.13E15 | 2.29E15 | 1.52E15 | 9.59E14 | ---     | ---     | 6.86E14 | 9.62E14 | 1.24E15 | 3.07E15 | 4.45E15 |
| 84  | 4.66E15 | 3.17E15 | 2.31E15 | 1.53E15 | 9.30E14 | ---     | ---     | 6.80E14 | 9.66E14 | 1.26E15 | 3.11E15 | 4.52E15 |
| 85  | 4.73E15 | 3.20E15 | 2.33E15 | 1.53E15 | 9.02E14 | ---     | ---     | 6.74E14 | 9.70E14 | 1.27E15 | 3.15E15 | 4.59E15 |
| 86  | 4.81E15 | 3.25E15 | 2.36E15 | 1.55E15 | 8.19E14 | ---     | 6.01E14 | 6.70E14 | 9.76E14 | 1.29E15 | 3.21E15 | 4.67E15 |
| 87  | 4.95E15 | 3.34E15 | 2.42E15 | 1.58E15 | 8.11E14 | ---     | 5.43E14 | 6.73E14 | 9.95E14 | 1.33E15 | 3.30E15 | 4.81E15 |
| 88  | 5.11E15 | 3.44E15 | 2.50E15 | 1.62E15 | 8.11E14 | 6.20E14 | 5.29E14 | 6.79E14 | 1.02E15 | 1.38E15 | 3.41E15 | 4.96E15 |
| 89  | 5.28E15 | 3.55E15 | 2.58E15 | 1.67E15 | 8.17E14 | 6.07E14 | 5.29E14 | 6.89E14 | 1.05E15 | 1.44E15 | 3.54E15 | 5.14E15 |
| 90  | 5.48E15 | 3.69E15 | 2.68E15 | 1.73E15 | 8.30E14 | 6.04E14 | 5.33E14 | 7.03E14 | 1.09E15 | 1.53E15 | 3.70E15 | 5.34E15 |
| 91  | 5.84E15 | 3.93E15 | 2.88E15 | 1.88E15 | 8.86E14 | 6.31E14 | 5.57E14 | 7.47E14 | 1.19E15 | 1.69E15 | 3.97E15 | 5.68E15 |
| 92  | 6.30E15 | 4.27E15 | 3.19E15 | 2.13E15 | 1.01E15 | 6.99E14 | 6.12E14 | 8.45E14 | 1.36E15 | 1.93E15 | 4.34E15 | 6.11E15 |
| 93  | 6.99E15 | 4.81E15 | 3.73E15 | 2.64E15 | 1.33E15 | 9.07E14 | 7.87E14 | 1.13E15 | 1.74E15 | 2.31E15 | 4.83E15 | ---     |
| 94  | 7.27E15 | 5.29E15 | 4.25E15 | 3.19E15 | 1.74E15 | 1.21E15 | 1.06E15 | 1.46E15 | 2.07E15 | 2.60E15 | 5.26E15 | ---     |

81 Table S21. Monthly averaged NO2 VCDs for Marambio for sunrise (am).

| SZA | Jan     | Feb     | Mar     | Apr     | May     | Jun     | Jul     | Aug     | Sep     | Oct     | Nov     | Dec     |
|-----|---------|---------|---------|---------|---------|---------|---------|---------|---------|---------|---------|---------|
| 80  | 5.26E15 | 4.20E15 | 3.10E15 | 1.92E15 | ---     | ---     | ---     | 8.21E14 | 1.18E15 | 1.57E15 | 3.66E15 | 4.55E15 |
| 81  | 5.31E15 | 4.24E15 | 3.13E15 | 1.94E15 | ---     | ---     | ---     | 8.24E14 | 1.19E15 | 1.58E15 | 3.69E15 | 4.59E15 |
| 82  | 5.36E15 | 4.29E15 | 3.17E15 | 1.97E15 | ---     | ---     | ---     | 8.11E14 | 1.20E15 | 1.60E15 | 3.73E15 | 4.63E15 |
| 83  | 5.43E15 | 4.35E15 | 3.22E15 | 2.01E15 | 1.14E15 | ---     | ---     | 8.21E14 | 1.22E15 | 1.63E15 | 3.78E15 | 4.69E15 |
| 84  | 5.50E15 | 4.42E15 | 3.27E15 | 2.04E15 | 1.13E15 | ---     | ---     | 8.33E14 | 1.24E15 | 1.65E15 | 3.83E15 | 4.76E15 |
| 85  | 5.57E15 | 4.49E15 | 3.33E15 | 2.08E15 | 1.13E15 | ---     | ---     | 8.45E14 | 1.25E15 | 1.68E15 | 3.89E15 | 4.82E15 |
| 86  | 5.66E15 | 4.57E15 | 3.39E15 | 2.12E15 | 1.06E15 | ---     | 6.97E14 | 8.58E14 | 1.27E15 | 1.71E15 | 3.96E15 | 4.90E15 |
| 87  | 5.81E15 | 4.70E15 | 3.50E15 | 2.19E15 | 1.10E15 | ---     | 6.46E14 | 8.80E14 | 1.31E15 | 1.77E15 | 4.07E15 | 5.03E15 |
| 88  | 5.98E15 | 4.85E15 | 3.62E15 | 2.26E15 | 1.14E15 | 7.32E14 | 6.57E14 | 9.03E14 | 1.35E15 | 1.84E15 | 4.21E15 | 5.18E15 |
| 89  | 6.15E15 | 5.02E15 | 3.74E15 | 2.35E15 | 1.18E15 | 7.69E14 | 6.78E14 | 9.28E14 | 1.40E15 | 1.92E15 | 4.36E15 | 5.34E15 |
| 90  | 6.36E15 | 5.21E15 | 3.90E15 | 2.45E15 | 1.22E15 | 8.03E14 | 7.02E14 | 9.59E14 | 1.45E15 | 2.03E15 | 4.54E15 | 5.53E15 |
| 91  | 6.71E15 | 5.56E15 | 4.19E15 | 2.65E15 | 1.32E15 | 8.67E14 | 7.50E14 | 1.03E15 | 1.58E15 | 2.22E15 | 4.85E15 | 5.84E15 |
| 92  | 7.16E15 | 6.03E15 | 4.62E15 | 2.98E15 | 1.50E15 | 9.79E14 | 8.41E14 | 1.16E15 | 1.79E15 | 2.50E15 | 5.26E15 | 6.25E15 |
| 93  | ---     | 6.75E15 | 5.33E15 | 3.61E15 | 1.89E15 | 1.23E15 | 1.06E15 | 1.47E15 | 2.19E15 | 2.93E15 | 5.81E15 | ---     |
| 94  | ---     | 7.34E15 | 5.97E15 | 4.24E15 | 2.35E15 | 1.56E15 | 1.34E15 | 1.79E15 | 2.54E15 | 3.25E15 | 6.24E15 | ---     |

82 Table S22. Monthly averaged NO2 VCDs for Marambio for sunset (pm).

| SZA | Jan     | Feb     | Mar     | Apr     | May     | Jun     | Jul     | Aug     | Sep     | Oct     | Nov     | Dec     |
|-----|---------|---------|---------|---------|---------|---------|---------|---------|---------|---------|---------|---------|
| 80  | 8.35E18 | 8.14E18 | 8.11E18 | 7.81E18 | ---     | ---     | ---     | 6.87E18 | 5.74E18 | 4.83E18 | 7.46E18 | 8.45E18 |
| 81  | 8.35E18 | 8.15E18 | 8.12E18 | 7.81E18 | ---     | ---     | ---     | 7.01E18 | 5.74E18 | 4.83E18 | 7.46E18 | 8.45E18 |
| 82  | 8.35E18 | 8.15E18 | 8.12E18 | 7.81E18 | ---     | ---     | ---     | 7.12E18 | 5.74E18 | 4.83E18 | 7.46E18 | 8.45E18 |
| 83  | 8.36E18 | 8.15E18 | 8.12E18 | 7.81E18 | 7.72E18 | ---     | ---     | 7.16E18 | 5.74E18 | 4.83E18 | 7.47E18 | 8.46E18 |
| 84  | 8.36E18 | 8.15E18 | 8.12E18 | 7.81E18 | 7.67E18 | ---     | ---     | 7.16E18 | 5.74E18 | 4.83E18 | 7.47E18 | 8.46E18 |
| 85  | 8.36E18 | 8.15E18 | 8.12E18 | 7.81E18 | 7.75E18 | ---     | ---     | 7.16E18 | 5.74E18 | 4.84E18 | 7.47E18 | 8.46E18 |
| 86  | 8.37E18 | 8.15E18 | 8.12E18 | 7.81E18 | 7.79E18 | ---     | 8.03E18 | 7.16E18 | 5.75E18 | 4.84E18 | 7.47E18 | 8.47E18 |
| 87  | 8.37E18 | 8.16E18 | 8.12E18 | 7.81E18 | 7.79E18 | ---     | 7.95E18 | 7.16E18 | 5.75E18 | 4.84E18 | 7.47E18 | 8.47E18 |
| 88  | 8.37E18 | 8.16E18 | 8.13E18 | 7.82E18 | 7.79E18 | 7.86E18 | 7.98E18 | 7.17E18 | 5.75E18 | 4.84E18 | 7.48E18 | 8.47E18 |
| 89  | 8.38E18 | 8.16E18 | 8.13E18 | 7.82E18 | 7.79E18 | 7.86E18 | 7.99E18 | 7.17E18 | 5.75E18 | 4.84E18 | 7.48E18 | 8.48E18 |
| 90  | 8.38E18 | 8.16E18 | 8.13E18 | 7.82E18 | 7.79E18 | 7.86E18 | 7.99E18 | 7.17E18 | 5.75E18 | 4.84E18 | 7.48E18 | 8.48E18 |
| 91  | 8.38E18 | 8.17E18 | 8.13E18 | 7.82E18 | 7.79E18 | 7.87E18 | 7.99E18 | 7.17E18 | 5.75E18 | 4.85E18 | 7.49E18 | 8.49E18 |
| 92  | 8.39E18 | 8.17E18 | 8.13E18 | 7.82E18 | 7.79E18 | 7.87E18 | 7.99E18 | 7.17E18 | 5.76E18 | 4.85E18 | 7.49E18 | 8.50E18 |
| 93  | 8.39E18 | 8.17E18 | 8.13E18 | 7.82E18 | 7.80E18 | 7.87E18 | 7.99E18 | 7.18E18 | 5.76E18 | 4.85E18 | 7.49E18 | ---     |
| 94  | 8.26E18 | 8.17E18 | 8.14E18 | 7.82E18 | 7.80E18 | 7.87E18 | 7.99E18 | 7.18E18 | 5.76E18 | 4.85E18 | 7.50E18 | ---     |

83 Table S23. Monthly averaged O3 VCDs for Marambio for sunrise (am).

| SZA | Jan     | Feb     | Mar     | Apr     | May     | Jun     | Jul     | Aug     | Sep     | Oct     | Nov     | Dec     |
|-----|---------|---------|---------|---------|---------|---------|---------|---------|---------|---------|---------|---------|
| 80  | 9.17E18 | 8.18E18 | 8.13E18 | 7.82E18 | ---     | ---     | ---     | 6.86E18 | 5.73E18 | 4.92E18 | 7.53E18 | 8.49E18 |
| 81  | 9.16E18 | 8.17E18 | 8.13E18 | 7.81E18 | ---     | ---     | ---     | 6.99E18 | 5.73E18 | 4.92E18 | 7.53E18 | 8.49E18 |
| 82  | 9.16E18 | 8.17E18 | 8.13E18 | 7.81E18 | ---     | ---     | ---     | 7.10E18 | 5.73E18 | 4.92E18 | 7.53E18 | 8.49E18 |
| 83  | 9.16E18 | 8.17E18 | 8.13E18 | 7.81E18 | 7.72E18 | ---     | ---     | 7.13E18 | 5.73E18 | 4.92E18 | 7.53E18 | 8.48E18 |
| 84  | 9.15E18 | 8.17E18 | 8.13E18 | 7.81E18 | 7.67E18 | ---     | ---     | 7.13E18 | 5.73E18 | 4.91E18 | 7.52E18 | 8.48E18 |
| 85  | 9.15E18 | 8.17E18 | 8.13E18 | 7.81E18 | 7.76E18 | ---     | ---     | 7.13E18 | 5.73E18 | 4.91E18 | 7.52E18 | 8.48E18 |
| 86  | 9.15E18 | 8.16E18 | 8.13E18 | 7.81E18 | 7.79E18 | ---     | 8.01E18 | 7.13E18 | 5.73E18 | 4.91E18 | 7.52E18 | 8.47E18 |
| 87  | 9.14E18 | 8.16E18 | 8.12E18 | 7.81E18 | 7.79E18 | ---     | 7.93E18 | 7.13E18 | 5.73E18 | 4.91E18 | 7.52E18 | 8.47E18 |
| 88  | 9.14E18 | 8.16E18 | 8.12E18 | 7.81E18 | 7.79E18 | 7.85E18 | 7.96E18 | 7.12E18 | 5.72E18 | 4.91E18 | 7.51E18 | 8.46E18 |
| 89  | 9.14E18 | 8.16E18 | 8.12E18 | 7.81E18 | 7.79E18 | 7.85E18 | 7.95E18 | 7.12E18 | 5.72E18 | 4.91E18 | 7.51E18 | 8.46E18 |
| 90  | 9.13E18 | 8.16E18 | 8.12E18 | 7.81E18 | 7.79E18 | 7.85E18 | 7.95E18 | 7.12E18 | 5.72E18 | 4.91E18 | 7.51E18 | 8.46E18 |
| 91  | 9.12E18 | 8.15E18 | 8.12E18 | 7.81E18 | 7.79E18 | 7.85E18 | 7.95E18 | 7.12E18 | 5.72E18 | 4.91E18 | 7.51E18 | 8.45E18 |
| 92  | 9.12E18 | 8.15E18 | 8.12E18 | 7.81E18 | 7.79E18 | 7.85E18 | 7.95E18 | 7.12E18 | 5.72E18 | 4.91E18 | 7.50E18 | 8.44E18 |
| 93  | ---     | 8.15E18 | 8.12E18 | 7.81E18 | 7.79E18 | 7.85E18 | 7.95E18 | 7.12E18 | 5.72E18 | 4.91E18 | 7.50E18 | ---     |
| 94  | ---     | 8.15E18 | 8.12E18 | 7.81E18 | 7.79E18 | 7.85E18 | 7.95E18 | 7.12E18 | 5.72E18 | 4.91E18 | 7.50E18 | ---     |

84 Table S24. Monthly averaged O3 VCDs for Marambio for sunset (pm).

85 **S5. Belgrano monthly averaged VCD values:**

| SZA | Feb      | Mar      | Apr      | Aug      | Sep      | Oct      |
|-----|----------|----------|----------|----------|----------|----------|
| 80  | 7.54E+10 | 2.06E+11 | ---      | ---      | 8.29E+12 | 1.90E+12 |
| 81  | 7.29E+10 | 2.08E+11 | ---      | ---      | 8.85E+12 | 1.98E+12 |
| 82  | 6.99E+10 | 2.06E+11 | ---      | ---      | 9.43E+12 | 2.08E+12 |
| 83  | 6.76E+10 | 1.96E+11 | ---      | ---      | 1.00E+13 | 2.23E+12 |
| 84  | 6.57E+10 | 1.82E+11 | ---      | ---      | 1.08E+13 | 2.40E+12 |
| 85  | 6.41E+10 | 1.65E+11 | ---      | ---      | 1.16E+13 | 2.60E+12 |
| 86  | 6.25E+10 | 1.43E+11 | ---      | ---      | 1.22E+13 | 2.82E+12 |
| 87  | 6.48E+10 | 1.23E+11 | ---      | ---      | 1.34E+13 | 3.26E+12 |
| 88  | 7.35E+10 | 1.02E+11 | 3.42E+11 | ---      | 1.49E+13 | 3.85E+12 |
| 89  | 9.31E+10 | 8.37E+10 | 2.90E+11 | ---      | 1.71E+13 | 4.82E+12 |
| 90  | 1.40E+11 | 7.62E+10 | 3.20E+11 | ---      | 2.01E+13 | 6.24E+12 |
| 91  | ---      | 1.10E+11 | 5.57E+11 | 2.81E+13 | 2.57E+13 | 8.72E+12 |
| 92  | ---      | 3.15E+11 | 1.69E+12 | 3.74E+13 | 3.89E+13 | 1.46E+13 |
| 93  | ---      | 7.62E+11 | 6.45E+12 | 7.68E+13 | 9.43E+13 | 3.69E+13 |
| 94  | ---      | 1.13E+12 | 1.14E+13 | 1.33E+14 | 1.58E+14 | 7.24E+13 |

86 Table S25. Monthly averaged OCIO VCDs for Belgrano for sunrise (am).

| SZA | Feb      | Mar      | Apr      | Aug      | Sep      | Oct      |
|-----|----------|----------|----------|----------|----------|----------|
| 80  | 7.96E+10 | 2.01E+11 | ---      | ---      | 7.97E+12 | 1.69E+12 |
| 81  | 7.75E+10 | 2.07E+11 | ---      | ---      | 8.51E+12 | 1.75E+12 |
| 82  | 7.55E+10 | 2.14E+11 | ---      | ---      | 9.07E+12 | 1.83E+12 |
| 83  | 7.35E+10 | 2.13E+11 | ---      | ---      | 9.62E+12 | 1.95E+12 |
| 84  | 7.07E+10 | 2.11E+11 | ---      | ---      | 1.03E+13 | 2.08E+12 |
| 85  | 6.76E+10 | 2.09E+11 | ---      | ---      | 1.11E+13 | 2.23E+12 |
| 86  | 6.43E+10 | 2.07E+11 | ---      | ---      | 1.17E+13 | 2.42E+12 |
| 87  | 6.41E+10 | 2.12E+11 | ---      | ---      | 1.28E+13 | 2.80E+12 |
| 88  | 6.48E+10 | 2.16E+11 | 6.27E+11 | ---      | 1.43E+13 | 3.31E+12 |
| 89  | 6.45E+10 | 2.24E+11 | 6.71E+11 | ---      | 1.64E+13 | 4.15E+12 |
| 90  | 6.98E+10 | 2.52E+11 | 8.64E+11 | ---      | 1.96E+13 | 5.39E+12 |
| 91  | ---      | 2.97E+11 | 1.37E+12 | 2.91E+13 | 2.62E+13 | 7.88E+12 |
| 92  | ---      | 4.16E+11 | 2.49E+12 | 4.20E+13 | 3.95E+13 | 1.46E+13 |
| 93  | ---      | 5.22E+11 | 4.23E+12 | 6.27E+13 | 5.92E+13 | 2.25E+13 |
| 94  | ---      | 6.80E+11 | 7.27E+12 | 9.05E+13 | 8.71E+13 | 3.75E+13 |

87 **Table S26.** Monthly averaged OCIO VCDs for Belgrano for sunset (pm).

| SZA | Feb      | Mar      | Apr      | Aug      | Sep      | Oct      |
|-----|----------|----------|----------|----------|----------|----------|
| 80  | 3.16E+13 | 3.50E+13 | ---      | ---      | 2.95E+13 | 2.64E+13 |
| 81  | 3.10E+13 | 3.48E+13 | ---      | ---      | 2.99E+13 | 2.66E+13 |
| 82  | 3.03E+13 | 3.46E+13 | ---      | ---      | 3.05E+13 | 2.68E+13 |
| 83  | 2.93E+13 | 3.41E+13 | ---      | ---      | 3.10E+13 | 2.71E+13 |
| 84  | 2.82E+13 | 3.34E+13 | ---      | ---      | 3.15E+13 | 2.73E+13 |
| 85  | 2.70E+13 | 3.25E+13 | ---      | ---      | 3.19E+13 | 2.76E+13 |
| 86  | 2.53E+13 | 3.10E+13 | ---      | ---      | 3.20E+13 | 2.77E+13 |
| 87  | 2.32E+13 | 2.87E+13 | ---      | ---      | 3.18E+13 | 2.77E+13 |
| 88  | 2.10E+13 | 2.58E+13 | 3.33E+13 | ---      | 3.16E+13 | 2.76E+13 |
| 89  | 1.79E+13 | 2.23E+13 | 2.97E+13 | ---      | 3.14E+13 | 2.74E+13 |
| 90  | 1.44E+13 | 1.79E+13 | 2.53E+13 | ---      | 3.07E+13 | 2.63E+13 |
| 91  | ---      | 1.27E+13 | 1.97E+13 | 2.80E+13 | 2.73E+13 | 2.34E+13 |
| 92  | ---      | 8.05E+12 | 1.35E+13 | 2.26E+13 | 2.08E+13 | 1.86E+13 |
| 93  | ---      | 4.19E+12 | 7.20E+12 | 1.27E+13 | 1.05E+13 | 1.00E+13 |
| 94  | ---      | 2.53E+12 | 4.68E+12 | 6.33E+12 | 4.94E+12 | 6.15E+12 |

88 **Table S27.** Monthly averaged BrO VCDs for Belgrano for sunrise (am).

| SZA | Feb      | Mar      | Apr      | Aug      | Sep      | Oct      |
|-----|----------|----------|----------|----------|----------|----------|
| 80  | 3.06E+13 | 3.33E+13 | ---      | ---      | 2.88E+13 | 2.53E+13 |
| 81  | 3.00E+13 | 3.29E+13 | ---      | ---      | 2.92E+13 | 2.54E+13 |
| 82  | 2.95E+13 | 3.28E+13 | ---      | ---      | 2.97E+13 | 2.56E+13 |
| 83  | 2.86E+13 | 3.22E+13 | ---      | ---      | 3.02E+13 | 2.58E+13 |
| 84  | 2.76E+13 | 3.15E+13 | ---      | ---      | 3.06E+13 | 2.60E+13 |
| 85  | 2.65E+13 | 3.07E+13 | ---      | ---      | 3.10E+13 | 2.61E+13 |
| 86  | 2.53E+13 | 2.99E+13 | ---      | ---      | 3.11E+13 | 2.63E+13 |
| 87  | 2.36E+13 | 2.84E+13 | ---      | ---      | 3.09E+13 | 2.64E+13 |
| 88  | 2.18E+13 | 2.65E+13 | 3.35E+13 | ---      | 3.07E+13 | 2.64E+13 |
| 89  | 1.92E+13 | 2.41E+13 | 3.16E+13 | ---      | 3.04E+13 | 2.62E+13 |
| 90  | 1.61E+13 | 2.12E+13 | 3.00E+13 | ---      | 3.01E+13 | 2.57E+13 |
| 91  | ---      | 1.74E+13 | 2.79E+13 | 2.89E+13 | 2.88E+13 | 2.45E+13 |
| 92  | ---      | 1.30E+13 | 2.44E+13 | 2.62E+13 | 2.64E+13 | 2.23E+13 |
| 93  | ---      | 8.95E+12 | 1.99E+13 | 2.15E+13 | 2.21E+13 | 1.82E+13 |
| 94  | ---      | 6.00E+12 | 1.57E+13 | 1.62E+13 | 1.74E+13 | 1.41E+13 |

89 **Table S28.** Monthly averaged BrO VCDs for Belgrano for sunset (pm).

90

| SZA | Feb      | Mar      | Apr      | Aug      | Sep      | Oct      |
|-----|----------|----------|----------|----------|----------|----------|
| 80  | 4.30E+15 | 2.34E+15 | ---      | ---      | 6.02E+14 | 1.01E+15 |
| 81  | 4.35E+15 | 2.30E+15 | ---      | ---      | 5.87E+14 | 1.02E+15 |
| 82  | 4.40E+15 | 2.27E+15 | ---      | ---      | 5.78E+14 | 1.03E+15 |
| 83  | 4.48E+15 | 2.29E+15 | ---      | ---      | 5.72E+14 | 1.04E+15 |
| 84  | 4.55E+15 | 2.31E+15 | ---      | ---      | 5.57E+14 | 1.06E+15 |
| 85  | 4.64E+15 | 2.33E+15 | ---      | ---      | 5.39E+14 | 1.07E+15 |
| 86  | 4.73E+15 | 2.36E+15 | ---      | ---      | 5.38E+14 | 1.09E+15 |
| 87  | 4.84E+15 | 2.44E+15 | ---      | ---      | 5.43E+14 | 1.12E+15 |
| 88  | 4.91E+15 | 2.52E+15 | 1.33E+15 | ---      | 5.50E+14 | 1.16E+15 |
| 89  | 5.02E+15 | 2.62E+15 | 1.34E+15 | ---      | 5.58E+14 | 1.17E+15 |
| 90  | 5.14E+15 | 2.74E+15 | 1.34E+15 | ---      | 5.69E+14 | 1.18E+15 |
| 91  | ---      | 3.01E+15 | 1.38E+15 | 2.86E+14 | 6.05E+14 | 1.26E+15 |
| 92  | ---      | 3.44E+15 | 1.51E+15 | 2.99E+14 | 6.83E+14 | 1.40E+15 |
| 93  | ---      | 4.24E+15 | 1.99E+15 | 3.54E+14 | 8.87E+14 | 1.73E+15 |
| 94  | ---      | 5.00E+15 | 2.57E+15 | 4.59E+14 | 1.12E+15 | 1.97E+15 |

91 **Table S29.** Monthly averaged NO2 VCDs for Belgrano for sunrise (am).

| SZA | Feb      | Mar      | Apr      | Aug      | Sep      | Oct      |
|-----|----------|----------|----------|----------|----------|----------|
| 80  | 4.45E+15 | 2.60E+15 | ---      | ---      | 6.56E+14 | 1.08E+15 |
| 81  | 4.49E+15 | 2.57E+15 | ---      | ---      | 6.45E+14 | 1.09E+15 |
| 82  | 4.54E+15 | 2.57E+15 | ---      | ---      | 6.40E+14 | 1.10E+15 |
| 83  | 4.61E+15 | 2.62E+15 | ---      | ---      | 6.42E+14 | 1.12E+15 |
| 84  | 4.68E+15 | 2.67E+15 | ---      | ---      | 6.31E+14 | 1.14E+15 |
| 85  | 4.76E+15 | 2.72E+15 | ---      | ---      | 6.18E+14 | 1.15E+15 |
| 86  | 4.84E+15 | 2.77E+15 | ---      | ---      | 6.31E+14 | 1.17E+15 |
| 87  | 4.95E+15 | 2.88E+15 | ---      | ---      | 6.49E+14 | 1.21E+15 |
| 88  | 5.02E+15 | 2.99E+15 | 1.56E+15 | ---      | 6.68E+14 | 1.25E+15 |
| 89  | 5.14E+15 | 3.11E+15 | 1.58E+15 | ---      | 6.87E+14 | 1.26E+15 |
| 90  | 5.27E+15 | 3.25E+15 | 1.60E+15 | ---      | 7.11E+14 | 1.28E+15 |
| 91  | ---      | 3.57E+15 | 1.66E+15 | 3.65E+14 | 7.64E+14 | 1.37E+15 |
| 92  | ---      | 4.05E+15 | 1.81E+15 | 3.90E+14 | 8.60E+14 | 1.52E+15 |
| 93  | ---      | 4.94E+15 | 2.34E+15 | 4.54E+14 | 1.07E+15 | 1.85E+15 |
| 94  | ---      | 5.74E+15 | 2.95E+15 | 5.59E+14 | 1.30E+15 | 2.08E+15 |

92 **Table S30.** Monthly averaged NO2 VCDs for Belgrano for sunset (pm).

| SZA | Feb      | Mar      | Apr      | Aug      | Sep      | Oct      |
|-----|----------|----------|----------|----------|----------|----------|
| 80  | 7.68E+18 | 7.06E+18 | ---      | ---      | 3.60E+18 | 3.06E+18 |
| 81  | 7.68E+18 | 7.16E+18 | ---      | ---      | 3.69E+18 | 3.06E+18 |
| 82  | 7.69E+18 | 7.27E+18 | ---      | ---      | 3.81E+18 | 3.06E+18 |
| 83  | 7.69E+18 | 7.27E+18 | ---      | ---      | 3.91E+18 | 3.06E+18 |
| 84  | 7.69E+18 | 7.27E+18 | ---      | ---      | 4.01E+18 | 3.06E+18 |
| 85  | 7.70E+18 | 7.27E+18 | ---      | ---      | 4.16E+18 | 3.07E+18 |
| 86  | 7.70E+18 | 7.27E+18 | ---      | ---      | 4.16E+18 | 3.07E+18 |
| 87  | 7.71E+18 | 7.27E+18 | ---      | ---      | 4.17E+18 | 3.07E+18 |
| 88  | 7.71E+18 | 7.27E+18 | 6.75E+18 | ---      | 4.17E+18 | 3.07E+18 |
| 89  | 7.67E+18 | 7.27E+18 | 6.77E+18 | ---      | 4.18E+18 | 3.06E+18 |
| 90  | 7.65E+18 | 7.28E+18 | 6.76E+18 | ---      | 4.18E+18 | 3.03E+18 |
| 91  | ---      | 7.28E+18 | 6.78E+18 | 5.81E+18 | 4.18E+18 | 3.02E+18 |
| 92  | ---      | 7.28E+18 | 6.75E+18 | 5.83E+18 | 4.19E+18 | 3.01E+18 |
| 93  | ---      | 7.28E+18 | 6.75E+18 | 6.00E+18 | 4.19E+18 | 2.99E+18 |
| 94  | ---      | 7.29E+18 | 6.75E+18 | 6.08E+18 | 4.19E+18 | 2.98E+18 |

93 **Table S31.** Monthly averaged O3 VCDs for Belgrano for sunrise (am).

94

| SZA | Feb      | Mar      | Apr      | Aug      | Sep      | Oct      |
|-----|----------|----------|----------|----------|----------|----------|
| 80  | 7.71E+18 | 7.08E+18 | ---      | ---      | 3.56E+18 | 3.09E+18 |
| 81  | 7.71E+18 | 7.18E+18 | ---      | ---      | 3.64E+18 | 3.08E+18 |
| 82  | 7.70E+18 | 7.28E+18 | ---      | ---      | 3.76E+18 | 3.08E+18 |
| 83  | 7.70E+18 | 7.28E+18 | ---      | ---      | 3.85E+18 | 3.08E+18 |
| 84  | 7.70E+18 | 7.28E+18 | ---      | ---      | 3.95E+18 | 3.08E+18 |
| 85  | 7.69E+18 | 7.28E+18 | ---      | ---      | 4.09E+18 | 3.08E+18 |
| 86  | 7.69E+18 | 7.28E+18 | ---      | ---      | 4.08E+18 | 3.07E+18 |
| 87  | 7.69E+18 | 7.28E+18 | ---      | ---      | 4.08E+18 | 3.07E+18 |
| 88  | 7.70E+18 | 7.27E+18 | 6.74E+18 | ---      | 4.07E+18 | 3.07E+18 |
| 89  | 7.65E+18 | 7.27E+18 | 6.76E+18 | ---      | 4.07E+18 | 3.05E+18 |
| 90  | 7.63E+18 | 7.27E+18 | 6.75E+18 | ---      | 4.07E+18 | 3.02E+18 |
| 91  | ---      | 7.27E+18 | 6.76E+18 | 5.76E+18 | 4.06E+18 | 3.00E+18 |
| 92  | ---      | 7.27E+18 | 6.73E+18 | 5.78E+18 | 4.06E+18 | 2.99E+18 |
| 93  | ---      | 7.27E+18 | 6.73E+18 | 5.95E+18 | 4.06E+18 | 2.97E+18 |
| 94  | ---      | 7.27E+18 | 6.73E+18 | 6.04E+18 | 4.06E+18 | 2.95E+18 |

95 **Table S32.** Monthly averaged O3 VCDs for Belgrano for sunset (pm).

96 **S6. 1D-DISORT – MYSTIC comparison:**

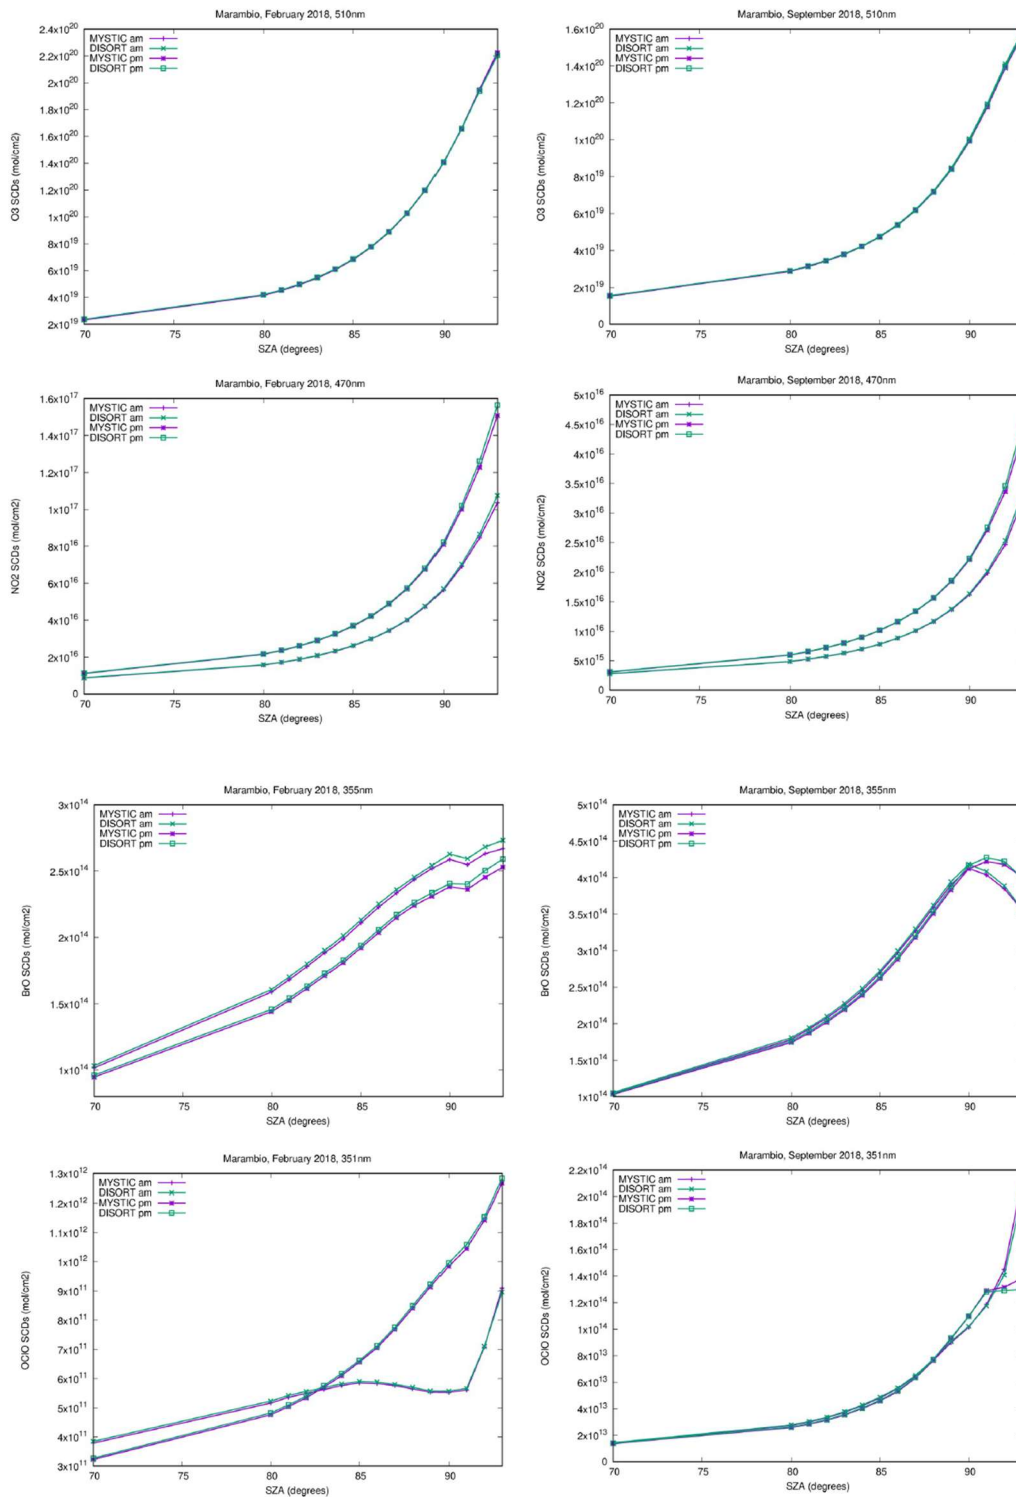

97

98

99 **Figure S5** SCD of O<sub>3</sub> (row 1), NO<sub>2</sub> (row 2), BrO (row 3) and OCIO (row 4) for Marambio, February (left)  
 100 and September (right), obtained with MYSTIC (violet) and 1D-DISORT (green), by using the same inputs:  
 101 monthly averaged profiles of the corresponding months.
